# Supplementary material
Source: HighWire-hosted journal article supplement (https://sti.bmj.com/content/99/5/351)
Supplement: inline-supplementary-material-2 [file inline-supplementary-material-2.pdf]

## Supplementary material 2: Complete search strategies.

### **MEDLINE (via PubMed):**

**#1:** "Mycoplasma genitalium"[MeSH] OR "Mycoplasma genitalium"

**#2:** Pre-Exposure Prophylaxis[MeSH] OR "Pre-Exposure Prophylaxis" OR "Pre Exposure Prophylaxis" OR PrEP

**#3:** "Epidemiology"[Mesh] OR "Prevalence"[Mesh] OR "epidemiology"[Subheading]

**#4:** "Drug Resistance, Bacterial"[MeSH] OR (Drug Resistance Bacterial) OR (Antibacterial Drug Resistance) OR (Antibiotic Resistance Bacterial) OR (Antibiotic Resistance) OR (antimicrobial resistance) OR (macrolide resistance) OR (fluoroquinolone resistance) OR (fluorinated quinolone resistance) OR "Tetracycline Resistance"[MeSH] OR (Tetracycline Resistance)

**#5:** #2 OR #3 OR #4

**#6:** #1 AND #5

### **Embase:**

**#1:** 'mycoplasma genitalium'/exp OR 'mycoplasma genitalium')

**#2:** 'pre-exposure prophylaxis'/exp OR 'pre-exposure prophylaxis' OR 'pre exposure prophylaxis' OR prep

**#3:** 'prevalence'/exp OR 'prevalence' OR 'prevalence study' OR 'epidemiology'/exp OR 'epidemiologic research' OR 'epidemiologic research design' OR 'epidemiologic studies' OR 'epidemiologic survey' OR 'epidemiological research' OR 'epidemiology'

**#4:** 'antibiotic resistance'/exp OR 'antibacterial drug resistance' OR 'antibacterial resistance' OR 'antibiotic non-susceptibility' OR 'antibiotic nonsusceptibility' OR 'antibiotic resistance' OR 'antimicrobial drug resistance' OR 'antimicrobial resistance' OR 'bacterial drug resistance' OR 'bacterial resistance' OR 'bacterium resistance' OR 'drug resistance, bacterial' OR 'drug resistance, microbial' OR 'microbial drug resistance' OR 'resistance, antibiotic' OR 'macrolide resistance'/exp OR 'macrolide antibiotic resistance' OR 'macrolide antimicrobial resistance' OR 'macrolide resistance' OR 'macrolides resistance' OR 'fluoroquinolone resistance'/exp OR 'fluorinated quinolone resistance' OR 'fluoro-quinolone resistance' OR 'fluoroquinolone resistance'

OR 'fluoroquinolones resistance' OR 'tetracycline resistance'/exp OR 'tetracyclin resistance' OR 'tetracycline (tc) resistance' OR 'tetracycline resistance'

#5: #2 OR #3 OR #4

#6: #1 AND #5

### **Web of Science:**

#1: ALL=(Mycoplasma genitalium)

#2: ALL=((pre-exposure prophylaxis) OR (pre exposure prophylaxis) OR (prep))

#3: (ALL=(prevalence OR epidemiology OR epidemiological))

#4: (((((ALL=((Antibiotic Resistance))) OR ALL=((antimicrobial resistance))) OR ALL=((macrolide resistance))) OR ALL=((fluoroquinolone resistance))) OR ALL=((Tetracycline Resistance))) OR ALL=((fluorinated quinolone resistance))

#5: #2 OR #3 OR #4

#6: #1 AND #5

### **WHO Global Index Medicus (AIM, IMEMR, IMSEAR, LILACS, WPRO):**

#1: "Mycoplasma genitalium"
