# Supplementary material
Source: HighWire-hosted journal article supplement (https://sti.bmj.com/content/99/5/351)
Supplement: inline-supplementary-material-3 [file inline-supplementary-material-3.pdf]

### Supplementary material 3: Studies excluded after full text assessment.

| Author, year            | Title                                                                                                                                                                                 | Journal                                        | doi                                | Reason for exclusion                             |
|-------------------------|---------------------------------------------------------------------------------------------------------------------------------------------------------------------------------------|------------------------------------------------|------------------------------------|--------------------------------------------------|
| Abdel Salam, 2020       | Frequency of Mycoplasma genitalium, Mycoplasma hominis and Ureaplasma urealyticum among Females Patients Attending Gynecology and Obstetrics Clinics at Ain shams University hospital | Journal of Pure and Applied Microbiology       | 10.22207/JPAM.14.2.39              | Population (did not report data from PrEP users) |
| Abusarah, 2013          | Molecular detection of potential sexually transmitted pathogens in semen and urine specimens of infertile and fertile males                                                           | Diagnostic Microbiology and Infectious Disease | 10.1016/j.diagmicrobio.2013.05.018 | Population (did not report data from PrEP users) |
| Adelantado, 2019        | Macrolide-Resistant Mycoplasma genitalium in Southeastern Region of the Netherlands, 2014-2017                                                                                        | Emerging Infectious Diseases                   | 10.3201/eid2511.190912             | Population (did not report data from PrEP users) |
| Adelantado, 2019        | Prevalence of Mycoplasma genitalium infection and antibiotic resistance in Navarra (North Spain)                                                                                      | Sexually Transmitted Infections                | 10.1136/sextrans-2019-054083       | Population (did not report data from PrEP users) |
| Agger, 2014             | Epidemiologic Factors and Urogenital Infections Associated With Preterm Birth in a Midwestern U.S. Population                                                                         | Obstetrics and Gynecology                      | 10.1097/aog.0000000000000470       | Population (did not report data from PrEP users) |
| Agyarko-Poku, 2011      | Aetiological agents of infective vaginal discharge among women attending a STD clinic in Kumasi, Ghana                                                                                | Sexually Transmitted Infections                | 10.1136/sextrans-2011-050108.501   | Population (did not report data from PrEP users) |
| Agyarko-Poku, 2013      | Prevalence of mycoplasma genitalium among women attending sexually transmitted infection clinic in Kumasi, Ghana                                                                      | Sexually Transmitted Infections                | 10.1136/sextrans-2013-051184.0689  | Population (did not report data from PrEP users) |
| Ahaus, 2022             | Changes in the user profiles of HIV pre-exposure prophylaxis (PrEP) before and after PrEP reimbursement                                                                               | Journal of Infection and Public Health         | 10.1016/j.jiph.2022.07.012         | Outcome                                          |
| Ajani, 2019             | Genital chlamydia trachomatis and mycoplasma genitalium among infertile women in university college hospital, Ibadan                                                                  | Sexually Transmitted Infections                | 10.1136/sextrans-2019-sti.540      | Population (did not report data from PrEP users) |
| Alakija, 2013           | Risk factors for mycoplasma genitalium among female sex workers in Nairobi, Kenya                                                                                                     | Sexually Transmitted Infections                | 10.1136/sextrans-2013-051184.0575  | Population (did not report data from PrEP users) |
| Alfarraj, 2017          | Isolation of Mycoplasma genitalium from endocervical swabs of infertile women                                                                                                         | Saudi Medical Journal                          | 10.15537/smj.2017.5.18820          | Population (did not report data from PrEP users) |
| Allan-Blitz, 2018       | Prevalence of Mycoplasma genitalium and Azithromycin-resistant Infections among Remnant Clinical Specimens, Los Angeles                                                               | Sexually Transmitted Diseases                  | 10.1097/OLQ.0000000000000829       | Population (did not report data from PrEP users) |
| Alvarez Rodríguez, 2013 | Results: Of the First HIV prevalence and risk behaviour study among female sex workers, Belize, 2012                                                                                  | Sexually Transmitted Infections                | 10.1136/sextrans-2013-051184.0566  | Population (did not report data from PrEP users) |
| Andersson, 2021         | Are Swedish swingers a risk group for sexually transmitted infections?                                                                                                                | International Journal of STD and AIDS          | 10.1177/0956462420973108           | Population (did not report data from PrEP users) |

|                  |                                                                                                                                                                        |                                                                                                                                                                           |                              |                                                  |
|------------------|------------------------------------------------------------------------------------------------------------------------------------------------------------------------|---------------------------------------------------------------------------------------------------------------------------------------------------------------------------|------------------------------|--------------------------------------------------|
| Andersson, 2021  | Are Urogenital Symptoms Caused by Sexually Transmitted Infections and Colonizing Bacteria?                                                                             | Journal of Lower Genital Tract Disease                                                                                                                                    | 10.1097/LGT.0000000000000608 | Population (did not report data from PrEP users) |
| Ando, 2021       | High prevalence of circulating dual-class resistant Mycoplasma genitalium in asymptomatic MSM in Tokyo, Japan                                                          | Jac-Antimicrobial Resistance                                                                                                                                              | 10.1093/jacamr/dlab091       | Population (did not report data from PrEP users) |
| Andreeva, 2012   | [Diagnostic and treatment patterns in management of male patients with nongonococcal urethritis: results of Russian multicentral cross-sectional study]                | Antibiotiki i khimioterapii (combining double inverted breve) = Antibiotics and chemotherapy [sic] / Ministerstvo meditsinskoĭ i mikrobiologicheskoi promyshlennosti SSSR | NR                           | Population (did not report data from PrEP users) |
| Angela, 2021     | Multi-year prevalence and macrolide resistance of Mycoplasma genitalium in clinical samples from a southern Italian hospital                                           | European Journal of Clinical Microbiology and Infectious Diseases                                                                                                         | 10.1007/s10096-020-04068-3   | Population (did not report data from PrEP users) |
| Ansejo, 2018     | Mycoplasma genitalium in Spain: prevalence of genital infection and frequency of resistance to macrolides                                                              | Enfermedades Infecciosas y Microbiología Clínica                                                                                                                          | 10.1016/j.eimc.2017.01.006   | Population (did not report data from PrEP users) |
| Arda, 2018       | Chronic Bacterial Prostatitis in a Turkish Population: The Microbiological Etiology and Distribution                                                                   | Journal of Academic Research in Medicine-Jarem                                                                                                                            | 10.5152/jarem.2018.2000      | Population (did not report data from PrEP users) |
| Ashshi, 2015     | Prevalence of 7 sexually transmitted organisms by multiplex real-time PCR in Fallopian tube specimens collected from Saudi women with and without ectopic pregnancy    | BMC Infectious Diseases                                                                                                                                                   | 10.1186/s12879-015-1313-1    | Population (did not report data from PrEP users) |
| Averbach, 2013   | Mycoplasma genitalium and preterm delivery at an urban community health center                                                                                         | International Journal of Gynecology and Obstetrics                                                                                                                        | 10.1016/j.ijgo.2013.06.005   | Population (did not report data from PrEP users) |
| Bachmann, 2020   | Prevalence of mycoplasma genitalium infection, antimicrobial resistance mutations, and symptom resolution following treatment of urethritis                            | Clinical Infectious Diseases                                                                                                                                              | 10.1093/cid/ciaa293          | Population (did not report data from PrEP users) |
| Bai, 2021        | Sexually transmitted infections and semen quality from subfertile men with and without leukocytospermia                                                                | Reproductive Biology and Endocrinology                                                                                                                                    | 10.1186/s12958-021-00769-2   | Population (did not report data from PrEP users) |
| Bainbridge, 2021 | High Prevalence of Urogenital and Rectal Mycoplasma genitalium in U.S. MSM with a History of STIs in the Last Year                                                     | Open Forum Infectious Diseases                                                                                                                                            | 10.1093/ofid/ofab466.163     | Population (did not report data from PrEP users) |
| Bajrovic, 2017   | Mycoplasma genitalium prevalence and variability based on gender, race and sexual preference in patients attending the Oakland county health department disease clinic | Open Forum Infectious Diseases                                                                                                                                            | 10.1093/ofid/ofx163.506      | Population (did not report data from PrEP users) |
| Balkus, 2016     | Periodic Presumptive Treatment for Vaginal Infections May Reduce the Incidence of Sexually Transmitted Bacterial Infections                                            | Journal of Infectious Diseases                                                                                                                                            | 10.1093/infdis/jiw043        | Population (did not report data from PrEP users) |
| Balle, 2021      | Hormonal contraception and risk of STIs and bacterial vaginosis in South African adolescents: Secondary analysis of a randomised trial                                 | Sexually Transmitted Infections                                                                                                                                           | 10.1136/sextrans-2020-054483 | Population (did not report data from PrEP users) |

|                        |                                                                                                                                                                                                 |                                                                  |                                |                                                  |
|------------------------|-------------------------------------------------------------------------------------------------------------------------------------------------------------------------------------------------|------------------------------------------------------------------|--------------------------------|--------------------------------------------------|
| Barbee, 2016           | An estimate of the proportion of symptomatic gonococcal, chlamydial and non-gonococcal non-chlamydial urethritis attributable to oral sex among men who have sex with men: a case-control study | Sexually Transmitted Infections                                  | 10.1136/sextrans-2015-052214   | Population (did not report data from PrEP users) |
| Barbee, 2019           | Rectal and pharyngeal M. Genitalium among men who have sex with men (MSM): Results from a longitudinal cohort study                                                                             | Sexually Transmitted Infections                                  | 10.1136/sextrans-2019-sti.648  | Population (did not report data from PrEP users) |
| Barberia, 2017         | Mycoplasma genitalium Macrolide and Fluoroquinolone Resistance: Prevalence and Risk Factors Among a 2013-2014 Cohort of Patients in Barcelona, Spain                                            | Sexually Transmitted Diseases                                    | 10.1097/olq.0000000000000631   | Population (did not report data from PrEP users) |
| Barnabas, 2018         | Converging epidemics of sexually transmitted infections and bacterial vaginosis in southern African female adolescents at risk of HIV                                                           | International Journal of STD and AIDS                            | 10.1177/0956462417740487       | Population (did not report data from PrEP users) |
| Basu, 2017             | High macrolide resistance in mycoplasma genitalium strains causing infection in Auckland, New Zealand                                                                                           | Journal of Clinical Microbiology                                 | 10.1128/JCM.00370-17           | Population (did not report data from PrEP users) |
| Batteiger, 2018        | Prevalence of rectal chlamydia trachomatis (CT) and mycoplasma genitalium (mg) in a cohort of men with and without nongonococcal urethritis (ngu)                                               | Sexually Transmitted Diseases                                    | NR                             | Population (did not report data from PrEP users) |
| Batteiger, 2019        | Detection of rectal chlamydia trachomatis in heterosexual men who report cunnilingus                                                                                                            | Sexually Transmitted Diseases                                    | 10.1097/OLQ.0000000000000998   | Population (did not report data from PrEP users) |
| Bayette, 2013          | Prevalence of Chlamydia trachomatis, Neisseria gonorrhoeae and Mycoplasma genitalium infections in the emergency department                                                                     | Pathologie Biologie                                              | 10.1016/j.patbio.2012.04.001   | Population (did not report data from PrEP users) |
| Bayigga, 2020          | Diverse vaginal microbiome was associated with pro-inflammatory vaginal milieu among pregnant women in Uganda                                                                                   | Human Microbiome Journal                                         | 10.1016/j.humic.2020.100076    | Population (did not report data from PrEP users) |
| Beesham, 2021          | High prevalence of curable sexually transmitted infections among HIV-uninfected women planning for pregnancy in Kwazulunatal, South Africa                                                      | Sexually Transmitted Infections                                  | 10.1136/sextrans-2021-sti.228  | Population (did not report data from PrEP users) |
| Beesley, 2022          | Testing for Mycoplasma genitalium in pelvic inflammatory disease: A clinical audit                                                                                                              | Australian and New Zealand Journal of Obstetrics and Gynaecology | 10.1111/ajo.13609              | Population (did not report data from PrEP users) |
| Begnis, 2021           | Prevalence and risk factors of Mycoplasma genitalium infection in patients attending a sexually transmitted infection clinic in Reunion Island: a cross-sectional study (2017–2018)             | BMC Infectious Diseases                                          | 10.1186/s12879-021-06193-6     | Population (did not report data from PrEP users) |
| Bellinato, 2021        | Clinical profile and co-infections of urethritis in males                                                                                                                                       | Italian Journal of Dermatology and Venereology                   | 10.23736/S2784-8671.20.06773-5 | Full text not found                              |
| Belokrinitsakaya, 2013 | Preconception screening for sexually transmitted infections in young healthy women: Cross-sectional study                                                                                       | Giornale Italiano di Ostetricia e Ginecologia                    | NR                             | Full text not found                              |
| Bercot, 2019           | High prevalence and antibiotic resistance of m genitalium infections in MSM on prep                                                                                                             | Topics in Antiviral Medicine                                     | NR                             | Duplicate data                                   |
| Berle, 2012            | Chlamydia trachomatis, Mycoplasma genitalium and Ureaplasma urealyticum in clinical and non-clinical settings, Arkhangelsk Oblast, Russia                                                       | International Journal of STD and AIDS                            | 10.1258/ijsa.2012.011410       | Population (did not report data from PrEP users) |

|                  |                                                                                                                                                                                                                                   |                                                     |                                    |                                                  |
|------------------|-----------------------------------------------------------------------------------------------------------------------------------------------------------------------------------------------------------------------------------|-----------------------------------------------------|------------------------------------|--------------------------------------------------|
| Bernier, 2020    | HIV and other sexually transmitted infections among female sex workers in Moscow (Russia): Prevalence and associated risk factors                                                                                                 | Sexually Transmitted Infections                     | 10.1136/sextrans-2019-054299       | Population (did not report data from PrEP users) |
| Bertolotti, 2016 | IST-04 - Impact of Mycoplasma genitalium in an overseas free and anonymous screening center in light of other sexually transmitted diseases: A cross-sectional study                                                              | Medecine et Maladies Infectieuses                   | 10.1016/S0399-077X(16)30435-8      | Population (did not report data from PrEP users) |
| Bhargava, 2021   | Etiology of cervicitis-are there new agents in play?                                                                                                                                                                              | Sexually Transmitted Infections                     | 10.1136/sextrans-2021-sti.408      | Population (did not report data from PrEP users) |
| Bjartling, 2012  | Mycoplasma genitalium in cervicitis and pelvic inflammatory disease among women at a gynecologic outpatient service                                                                                                               | American Journal of Obstetrics and Gynecology       | 10.1016/j.ajog.2012.02.036         | Population (did not report data from PrEP users) |
| Bjartling, 2013  | Mycoplasma genitalium and chlamydia trachomatis in laparoscopically diagnosed pelvic inflammatory disease                                                                                                                         | Sexually Transmitted Infections                     | 10.1136/sextrans-2013-051184.0045  | Population (did not report data from PrEP users) |
| Bjessessor, 2016 | The contribution of Mycoplasma genitalium to the aetiology of sexually acquired infectious proctitis in men who have sex with men                                                                                                 | Clinical Microbiology and Infection                 | 10.1016/j.cmi.2015.11.016          | Population (did not report data from PrEP users) |
| Björnelius, 2017 | Mycoplasma genitalium macrolide resistance in Stockholm, Sweden                                                                                                                                                                   | Sexually Transmitted Infections                     | 10.1136/sextrans-2016-052688       | Population (did not report data from PrEP users) |
| Black, 2008      | The detection of urethritis pathogens among patients with the male urethritis syndrome, genital ulcer syndrome and HIV voluntary counselling and testing clients: should South Africa's syndromic management approach be revised? | Sex Transm Infect                                   | 10.1136/sti.2007.028464            | Population (did not report data from PrEP users) |
| Blanco, 2022     | Prevalence of Mycoplasma genitalium and other sexually transmitted pathogens in male urethritis in a sexual health centre in New Caledonia                                                                                        | Int J STD AIDS                                      | 10.1177/09564624221103808          | Population (did not report data from PrEP users) |
| Blockl, 2018     | Mycoplasma genitalium: Prevalence, Coinfections and Rate of Therapy Success after First-Line Treatment in an infectious Focal Medical Practice in Berlin                                                                          | Journal Der Deutschen Dermatologischen Gesellschaft | NR                                 | Population (did not report data from PrEP users) |
| Blockl, 2019     | PREVALENCE AND CLINICAL FEATURES OF MYCOPLASMA GENITALIUM IN PATIENTS ATTENDING A STI OUTPATIENT CLINIC IN BERLIN: 2013-2017                                                                                                      | Sexually Transmitted Infections                     | 10.1136/sextrans-2019-sti.681      | Population (did not report data from PrEP users) |
| Bonafede, 2016   | Evidence of low rates of mycoplasma genitalium assessment among commercially insured women with an sti-related diagnosis                                                                                                          | Sexually Transmitted Diseases                       | 10.1097/01.olq.0000503358.65329.6f | Population (did not report data from PrEP users) |
| Borgobna, 2018   | Vaginal metabolomic signatures distinguish chlamydia mono-infected, chlamydia trachomatis/mycoplasma genitalium co-infected and un-infected women                                                                                 | American Journal of Obstetrics and Gynecology       | 10.1016/j.ajog.2018.10.088         | Population (did not report data from PrEP users) |
| Borgobna, 2020   | The association of Chlamydia trachomatis and Mycoplasma genitalium infection with the vaginal metabolome                                                                                                                          | Scientific reports                                  | 10.1038/s41598-020-60179-z         | Population (did not report data from PrEP users) |
| Braam, 2017      | High prevalence of the A2058T macrolide resistance-associated mutation in Mycoplasma genitalium strains from the Netherlands                                                                                                      | Journal of Antimicrobial Chemotherapy               | 10.1093/jac/dkw584                 | Population (did not report data from PrEP users) |

|                      |                                                                                                                                                                                                           |                                       |                                  |                                                  |
|----------------------|-----------------------------------------------------------------------------------------------------------------------------------------------------------------------------------------------------------|---------------------------------------|----------------------------------|--------------------------------------------------|
| Braam, 2020          | Evaluating the prevalence and risk factors for macrolide resistance in <i>Mycoplasma genitalium</i> using a newly developed qPCR assay                                                                    | PLoS One                              | 10.1371/journal.pone.0240836     | Population (did not report data from PrEP users) |
| Braam, 2022          | Macrolide-Resistant <i>Mycoplasma genitalium</i> Impairs Clinical Improvement of Male Urethritis After Empirical Treatment                                                                                | Sexually Transmitted Diseases         | 10.1097/olq.0000000000001591     | Population (did not report data from PrEP users) |
| Bradshaw, 2013       | Prevalent and Incident Bacterial Vaginosis Are Associated with Sexual and Contraceptive Behaviours in Young Australian Women                                                                              | PLoS ONE                              | 10.1371/journal.pone.0057688     | Population (did not report data from PrEP users) |
| Bras-Cachinho, 2021  | <i>Mycoplasma genitalium</i> : Prevalence of macrolide and fluoroquinolone resistance at the University Hospital of Tours, and check of the S-DiaMGRes® (Diagenode Diagnostics) assay                     | Annales de biologie clinique          | 10.1684/abc.2021.1633            | Full text not found                              |
| Brehony, 2021        | Evaluation of molecular testing for <i>Mycoplasma genitalium</i> for symptomatic women                                                                                                                    | Irish Journal of Medical Science      | 10.1007/s11845-021-02782-1       | Population (did not report data from PrEP users) |
| Broad, 2017          | PREVALENCE AND RISK FACTORS ASSOCIATED WITH CHLAMYDIA TRACHOMATIS (CT), MYCOPLASMA GENITALIUM (MG) AND NEISSERIA GONORRHOEAE (NG): CROSS-SECTIONAL STUDY IN THREE SEXUAL HEALTH CLINICS                   | Sexually Transmitted Infections       | 10.1136/sextrans-2017-053232.248 | Population (did not report data from PrEP users) |
| Broad, 2021          | High prevalence of coinfection of azithromycin-resistant <i>Mycoplasma genitalium</i> with other STIs: A prospective observational study of London-based symptomatic and STI-contact clinic attendees     | Sexually Transmitted Infections       | 10.1136/sextrans-2019-054356     | Population (did not report data from PrEP users) |
| Brosh-Nissimov, 2018 | Management of sexually transmissible infections in the era of multiplexed molecular diagnostics: A primary care survey                                                                                    | Sexual Health                         | 10.1071/SH17190                  | Population (did not report data from PrEP users) |
| Bruisten, 2019       | <i>Mycoplasma genitalium</i> in clients visiting two Dutch STI clinics: Very high prevalence and resistance to azithromycin                                                                               | Sexually Transmitted Infections       | 10.1136/sextrans-2019-sti.678    | Population (did not report data from PrEP users) |
| Cabecinha, 2017      | Finding sexual partners online: Prevalence and associations with sexual behaviour, STI diagnoses and other sexual health outcomes in the British population                                               | Sexually Transmitted Infections       | 10.1136/sextrans-2016-052994     | Population (did not report data from PrEP users) |
| Calas, 2021          | Prevalence of urogenital, anal, and pharyngeal infections with <i>Chlamydia trachomatis</i> , <i>Neisseria gonorrhoeae</i> , and <i>Mycoplasma genitalium</i> : a cross-sectional study in Reunion island | BMC Infectious Diseases               | 10.1186/s12879-021-05801-9       | Population (did not report data from PrEP users) |
| Cameron, 2018        | Epstein-Barr Virus, High-Risk Human Papillomavirus and Abnormal Cervical Cytology in a Prospective Cohort of African Female Sex Workers                                                                   | Sexually Transmitted Diseases         | 10.1097/OLQ.0000000000000857     | Population (did not report data from PrEP users) |
| Camporiando, 2016    | Detection of HPV and co-infecting pathogens in healthy Italian women by multiplex real-time PCR                                                                                                           | Infezioni in Medicina                 | NR                               | Population (did not report data from PrEP users) |
| Camus, 2021          | Acceptability and efficacy of vaginal self-sampling for genital infection and bacterial vaginosis: A cross-sectional study                                                                                | PLoS ONE                              | 10.1371/journal.pone.0260021     | Population (did not report data from PrEP users) |
| Carina, 2015         | Detection of <i>Mycoplasma genitalium</i> and <i>Chlamydia trachomatis</i> in three different self-collected genital specimens in women                                                                   | International Journal of STD and AIDS | 10.1177/0956462415601768         | Population (did not report data from PrEP users) |

|                     |                                                                                                                                                                                                                                 |                                                                   |                                    |                                                  |
|---------------------|---------------------------------------------------------------------------------------------------------------------------------------------------------------------------------------------------------------------------------|-------------------------------------------------------------------|------------------------------------|--------------------------------------------------|
| Carne, 2013         | Prevalence, clinical features and quantification of genital non-viral infections                                                                                                                                                | International Journal of STD and AIDS                             | 10.1177/0956462412472306           | Population (did not report data from PrEP users) |
| Caruso, 2021        | Current and Future Trends in the Laboratory Diagnosis of Sexually Transmitted Infections                                                                                                                                        | International Journal of Environmental Research and Public Health | 10.3390/ijerph18031038             | Population (did not report data from PrEP users) |
| Casas, 2013         | Hallazgos de <i>Mycoplasma hominis</i> y <i>Ureaplasma urealyticum</i> en mujeres con infecciones urogenitales                                                                                                                  | Arch. méd. Camaguey                                               | NR                                 | Population (did not report data from PrEP users) |
| Casillas-Vega, 2016 | Sexually transmitted pathogens, coinfections and risk factors in patients attending obstetrics and gynecology clinics in Jalisco, Mexico                                                                                        | Salud publica de Mexico                                           | NR                                 | Population (did not report data from PrEP users) |
| Casillas-Vega, 2017 | Causative agents, diseases, epidemiology and diagnosis of sexually transmitted infections                                                                                                                                       | Reviews in Medical Microbiology                                   | 10.1097/mrm.000000000000089        | Population (did not report data from PrEP users) |
| Chakezha, 2017      | Demographic and clinical profiles of women with bacterial vaginosis and sexually transmitted infections: Implications for the management of vaginal discharge syndrome in South Africa                                          | Sexually Transmitted Infections                                   | 10.1136/sextrans-2017-053264.453   | Population (did not report data from PrEP users) |
| Chambers, 2016      | Exposures associated with nongonococcal urethritis (NGU) in men who have sex with women only (MSW) and men who have sex with men only (MSM)                                                                                     | Sexually Transmitted Diseases                                     | 10.1097/01.olq.0000503358.65329.6f | Population (did not report data from PrEP users) |
| Che, 2022           | <i>Mycoplasma genitalium</i> and <i>Chlamydia trachomatis</i> infection among women in Southwest China: a retrospective study                                                                                                   | Epidemiology and Infection                                        | 10.1017/S0950268822001066          | Population (did not report data from PrEP users) |
| Chernesky, 2017     | Urinary Meatal Swabbing Detects More Men Infected with <i>Mycoplasma genitalium</i> and Four Other Sexually Transmitted Infections Than First Catch Urine                                                                       | Sexually Transmitted Diseases                                     | 10.1097/OLQ.0000000000000618       | Population (did not report data from PrEP users) |
| Chernesky, 2019     | <i>Mycoplasma genitalium</i> , <i>Chlamydia trachomatis</i> , and <i>Neisseria gonorrhoeae</i> Detected With Aptima Assays Performed on Self-Obtained Vaginal Swabs and Urine Collected at Home and in a Clinic                 | Sexually Transmitted Diseases                                     | 10.1097/olq.0000000000001004       | Population (did not report data from PrEP users) |
| Chesnay, 2020       | Contribution of a molecular test for the diagnosis of genital infection with <i>Trichomonas vaginalis</i> and <i>Mycoplasma genitalium</i>                                                                                      | Annales De Biologie Clinique                                      | 10.1684/abc.2020.1589              | Population (did not report data from PrEP users) |
| Chirenje, 2018      | The Etiology of Vaginal Discharge Syndrome in Zimbabwe: Results from the Zimbabwe STI Etiology Study                                                                                                                            | Sex Transm Dis                                                    | 10.1097/olq.0000000000000771       | Population (did not report data from PrEP users) |
| Chitneni, 2020      | Partner notification and treatment outcomes among South African adolescents and young adults diagnosed with a sexually transmitted infection via laboratory-based screening                                                     | International Journal of STD and AIDS                             | 10.1177/0956462420915395           | Population (did not report data from PrEP users) |
| Cho, 2016           | Prevalence of <i>chlamydia trachomatis</i> , <i>neisseria gonorrhoeae</i> , <i>mycoplasma genitalium</i> , <i>ureaplasma urealyticum</i> in chronic prostatitis category IIIa and IIIb patients using polymerase chain reaction | International Journal of Urology                                  | 10.1111/iju.13149                  | Population (did not report data from PrEP users) |
| Choi, 2013          | Prevalence and associated factors for four sexually transmissible microorganisms in middle-aged men receiving general prostate health checkups: A polymerase chain reaction-based study in Korea                                | Korean Journal of Urology                                         | 10.4111/kju.2013.54.1.53           | Population (did not report data from PrEP users) |
| Chow, 2014          | Testing commercial sex workers for sexually transmitted infections in Victoria, Australia: An evaluation of the impact of reducing the frequency of testing                                                                     | PLoS ONE                                                          | 10.1371/journal.pone.0103081       | Population (did not report data from PrEP users) |

|                 |                                                                                                                                                                                                                          |                                                                   |                               |                                                  |
|-----------------|--------------------------------------------------------------------------------------------------------------------------------------------------------------------------------------------------------------------------|-------------------------------------------------------------------|-------------------------------|--------------------------------------------------|
| Chra, 2018      | Prevalence of Mycoplasma genitalium and other sexually-transmitted pathogens among high-risk individuals in Greece                                                                                                       | GERMS                                                             | 10.18683/germs.2018.1128      | Population (did not report data from PrEP users) |
| Clarivet, 2014  | Prevalence of Chlamydia trachomatis, Neisseria gonorrhoeae and Mycoplasma genitalium in asymptomatic patients under 30 years of age screened in a French sexually transmitted infections clinic                          | European Journal of Dermatology                                   | 10.1684/ejd.2014.2413         | Population (did not report data from PrEP users) |
| Clifton, 2018   | STI Risk Perception in the British Population and How It Relates to Sexual Behaviour and STI Healthcare Use: Findings From a Cross-sectional Survey (Natsal-3)                                                           | EClinicalMedicine                                                 | 10.1016/j.eclinm.2018.08.001  | Population (did not report data from PrEP users) |
| Compain, 2019   | Low prevalence of common sexually transmitted infections contrasting with high prevalence of mycoplasma asymptomatic genital carriage: A community-based cross-sectional survey in adult women living in N'Djamena, Chad | Open Microbiology Journal                                         | 10.2174/1874285801913010222   | Population (did not report data from PrEP users) |
| Contini, 2018   | Investigation on silent bacterial infections in specimens from pregnant women affected by spontaneous miscarriage                                                                                                        | Journal of Cellular Physiology                                    | 10.1002/jcp.26952             | Population (did not report data from PrEP users) |
| Coorevits, 2018 | Identifying a consensus sample type to test for Chlamydia trachomatis, Neisseria gonorrhoeae, Mycoplasma genitalium, Trichomonas vaginalis and human papillomavirus                                                      | Clinical Microbiology and Infection                               | 10.1016/j.cmi.2018.03.013     | Population (did not report data from PrEP users) |
| Coorevits, 2018 | Macrolide resistance in Mycoplasma genitalium from female sex workers in Belgium                                                                                                                                         | Journal of Global Antimicrobial Resistance                        | 10.1016/j.jgar.2017.09.018    | Population (did not report data from PrEP users) |
| Cosentino, 2012 | Use of nucleic acid amplification testing for diagnosis of anorectal sexually transmitted infections                                                                                                                     | Journal of Clinical Microbiology                                  | 10.1128/JCM.00185-12          | Population (did not report data from PrEP users) |
| Cowley, 2021    | Prevalence of and risk factors for curable sexually transmitted infections on Bubaque Island, Guinea Bissau                                                                                                              | Sexually Transmitted Infections                                   | 10.1136/sextrans-2019-054351  | Population (did not report data from PrEP users) |
| Cox, 2016       | Mycoplasma hominis and Gardnerella vaginalis display a significant synergistic relationship in bacterial vaginosis                                                                                                       | European Journal of Clinical Microbiology and Infectious Diseases | 10.1007/s10096-015-2564-x     | Population (did not report data from PrEP users) |
| Cox, 2016       | The common vaginal commensal bacterium Ureaplasma parvum is associated with chorioamnionitis in extreme preterm labor                                                                                                    | Journal of Maternal-Fetal and Neonatal Medicine                   | 10.3109/14767058.2016.1140734 | Population (did not report data from PrEP users) |
| Cox, 2016       | Ureaplasma parvum and Mycoplasma genitalium are found to be significantly associated with microscopy-confirmed urethritis in a routine genitourinary medicine setting                                                    | International Journal of STD and AIDS                             | 10.1177/0956462415597620      | Population (did not report data from PrEP users) |
| Cox, 2017       | Gardnerella vaginalis and Mollicute detection in rectal swabs from men who have sex with men                                                                                                                             | Int J STD AIDS                                                    | 10.1177/0956462416665060      | Population (did not report data from PrEP users) |
| Creswell, 2012  | HIV and STI control in El Salvador: Results from an integrated behavioural survey among men who have sex with men                                                                                                        | Sexually Transmitted Infections                                   | 10.1136/sextrans-2012-050521  | Population (did not report data from PrEP users) |
| Crowell, 2020   | Anorectal and Urogenital Mycoplasma genitalium in Nigerian Men Who Have Sex With Men and Transgender Women: Prevalence, Incidence, and Association With HIV                                                              | Sexually Transmitted Diseases                                     | 10.1097/olq.0000000000001105  | Population (did not report data from PrEP users) |

|                     |                                                                                                                                                                                                             |                                              |                                   |                                                             |
|---------------------|-------------------------------------------------------------------------------------------------------------------------------------------------------------------------------------------------------------|----------------------------------------------|-----------------------------------|-------------------------------------------------------------|
| Cusini, 2021        | Trend of main STIs during COVID-19 pandemic in Milan, Italy                                                                                                                                                 | Sex Transm Infect                            | 10.1136/sextrans-2020-054608      | Population (did not report data from PrEP users)            |
| Dabee, 2019         | Defining characteristics of genital health in South African adolescent girls and young women at high risk for HIV infection                                                                                 | PLoS One                                     | 10.1371/journal.pone.0213975      | Population (did not report data from PrEP users)            |
| Daley, 2014         | Mycoplasma genitalium and its resistance to azithromycin in incarcerated men from Far North Queensland                                                                                                      | Sexual Health                                | 10.1071/SH14147                   | Population (did not report data from PrEP users)            |
| Dao, 2020           | Risk factors for symptoms of infection and microbial carriage among French medical students abroad                                                                                                          | International Journal of Infectious Diseases | 10.1016/j.ijid.2020.08.075        | Population (did not report data from PrEP users)            |
| Datcu, 2013         | Vaginal microbiome in women from Greenland assessed by microscopy and quantitative PCR                                                                                                                      | BMC Infectious Diseases                      | 10.1186/1471-2334-13-480          | Population (did not report data from PrEP users)            |
| Dave, 2012          | Women's health study of Mycoplasma genitalium: A feasibility study                                                                                                                                          | Sexually Transmitted Infections              | 10.1136/sextrans-2012-050601c.41  | Population (did not report data from PrEP users)            |
| Dave, 2013          | Mycoplasma genitalium prevalence and risk factors among young sexually active women in the general population and attending sexually transmitted infection clinics in London, UK                            | Sexually Transmitted Infections              | 10.1136/sextrans-2013-051184.0522 | Population (did not report data from PrEP users)            |
| Davis, 2019         | Does voluntary medical male circumcision protect against sexually transmitted infections among men and women in real-world scale-up settings? Findings of a household survey in KwaZulu-Natal, South Africa | Bmj Global Health                            | 10.1136/bmjgh-2019-001389         | Population (did not report data from PrEP users)            |
| Day, 2022           | Detection of markers predictive of macrolide and fluoroquinolone resistance in Mycoplasma genitalium from patients attending sexual health services                                                         | Sex Transm Infect                            | 10.1136/sextrans-2020-054897      | Population (did not report data from PrEP users)            |
| De Baetselier, 2018 | High Level of macrolide resistance of mycoplasma genitalium found among MSM at high risk for HIV in a belgian PrEP demonstration project                                                                    | AIDS Research and Human Retroviruses         | 10.1089/aid.2018.5000.abstracts   | Population (duplicated)                                     |
| De Baetselier, 2019 | Prevalence of STIS among msm initiating prep in West-Africa (COHMSM-prep ANRS 12369-expertise France)                                                                                                       | Sexually Transmitted Infections              | 10.1136/sextrans-2019-sti.617     | Population (did not report data from PrEP users)            |
| De Baetselier, 2021 | An alarming high prevalence of resistance-associated mutations to macrolides and fluoroquinolones in Mycoplasma genitalium in Belgium: Results from samples collected between 2015 and 2018                 | Sexually Transmitted Infections              | 10.1136/sextrans-2020-054511      | Outcome (report results in number of samples, not patients) |
| de Jong, 2016       | Large two-centre study into the prevalence of Mycoplasma genitalium and Trichomonas vaginalis in the Netherlands                                                                                            | International Journal of STD and AIDS        | 10.1177/0956462415596496          | Population (did not report data from PrEP users)            |
| de La Cruz, 2015    | The prevalence of mycoplasma genitalium in women with interstitial cystitis or chronic irritative urinary symptoms                                                                                          | Neurourology and Urodynamics                 | 10.1002/nau.22738                 | Population (did not report data from PrEP users)            |
| de Souza, 2021      | Main etiological agents identified in 170 men with urethritis attended at the Fundação Alfredo da Matta, Manaus, Amazonas, Brazil                                                                           | Anais Brasileiros de Dermatologia            | 10.1016/j.abd.2020.07.007         | Population (did not report data from PrEP users)            |



|                   |                                                                                                                                                                                    |                                                                |                                    |                                                  |
|-------------------|------------------------------------------------------------------------------------------------------------------------------------------------------------------------------------|----------------------------------------------------------------|------------------------------------|--------------------------------------------------|
| de Walque, 2012   | Incentivising safe sex: A randomised trial of conditional cash transfers for HIV and sexually transmitted infection prevention in rural Tanzania                                   | BMJ Open                                                       | 10.1136/bmjopen-2011-000747        | Population (did not report data from PrEP users) |
| Deborde, 2019     | High prevalence of Mycoplasma genitalium infection and macrolide resistance in patients enrolled in HIV pre-exposure prophylaxis program                                           | Medecine et Maladies Infectieuses                              | 10.1016/j.medmal.2019.03.007       | Population (duplicated)                          |
| Deguchi, 2015     | Drug resistance-associated mutations in mycoplasma genitalium in female sex workers, Japan                                                                                         | Emerging Infectious Diseases                                   | 10.3201/eid2106.142013             | Population (did not report data from PrEP users) |
| Dehon, 2014       | Mycoplasma genitalium infection is associated with microscopic signs of cervical inflammation in liquid cytology specimens                                                         | Journal of Clinical Microbiology                               | 10.1128/JCM.00159-14               | Population (did not report data from PrEP users) |
| del Prete, 2017   | Simultaneous detection and identification of STI pathogens by multiplex Real-Time PCR in genital tract specimens in a selected area of Apulia, a region of Southern Italy          | Infection                                                      | 10.1007/s15010-017-1002-7          | Population (did not report data from PrEP users) |
| des Marais, 2014  | Home-based self-collection for the detection of sexually transmitted infections in high-risk women in North Carolina                                                               | Sexually Transmitted Diseases                                  | NR                                 | Population (did not report data from PrEP users) |
| des Marais, 2018  | Home Self-Collection by Mail to Test for Human Papillomavirus and Sexually Transmitted Infections                                                                                  | Obstetrics and Gynecology                                      | 10.1097/AOG.0000000000002964       | Population (did not report data from PrEP users) |
| Desdorf, 2021     | Mycoplasma genitalium prevalence and macrolide resistance-associated mutations and coinfection with Chlamydia trachomatis in Southern Jutland, Denmark                             | APMIS                                                          | 10.1111/apm.13174                  | Population (did not report data from PrEP users) |
| Dhawan, 2020      | High prevalence of Mycoplasma genitalium in men who have sex with men: A cross-sectional study                                                                                     | Indian Journal of Dermatology, Venereology and Leprology       | 10.4103/ijdv.IJDVL_494_18          | Population (did not report data from PrEP users) |
| Dionne-Odom, 2018 | High prevalence of multidrug-resistant mycoplasma genitalium in human immunodeficiency virus-infected men who have sex with men in Alabama                                         | Clinical Infectious Diseases                                   | 10.1093/cid/cix853                 | Population (did not report data from PrEP users) |
| Dirks, 2017       | High mycoplasma genitalium prevalence in chlamydia trachomatis positive patients                                                                                                   | Sexually Transmitted Infections                                | 10.1136/sextrans-2017-053264.335   | Population (did not report data from PrEP users) |
| Djomand, 2016     | Prevalence and Correlates of Genital Infections among Newly Diagnosed Human Immunodeficiency Virus-Infected Adults Entering Human Immunodeficiency Virus Care in Windhoek, Namibia | Sexually Transmitted Diseases                                  | 10.1097/OLQ.0000000000000513       | Population (did not report data from PrEP users) |
| Donders, 2016     | Screening for abnormal vaginal microflora by self-assessed vaginal pH does not enable detection of sexually transmitted infections in Ugandan women                                | Diagnostic Microbiology and Infectious Disease                 | 10.1016/j.diagmicrobio.2015.12.018 | Population (did not report data from PrEP users) |
| Donders, 2017     | Mycoplasma/Ureaplasma infection in pregnancy: To screen or not to screen                                                                                                           | Journal of Perinatal Medicine                                  | 10.1515/jpm-2016-0111              | Population (did not report data from PrEP users) |
| Downey, 2015      | Epidemiology of sexually transmitted infections in rural Haitian men                                                                                                               | International Journal of STD and AIDS                          | 10.1177/0956462414551236           | Population (did not report data from PrEP users) |
| Drago, 2020       | Common bacterial urogenital infections: a study on their aetiology and prevalence in a sexually transmitted infections centre                                                      | Journal of the European Academy of Dermatology and Venereology | 10.1111/jdv.16504                  | Population (did not report data from PrEP users) |

|                     |                                                                                                                                                                       |                                                                   |                                    |                                                  |
|---------------------|-----------------------------------------------------------------------------------------------------------------------------------------------------------------------|-------------------------------------------------------------------|------------------------------------|--------------------------------------------------|
| Duba, 2017          | Detection of genital mycoplasmas in women visiting the infertility clinic of an academic hospital, pretoria, South Africa                                             | Sexually Transmitted Infections                                   | 10.1136/sextrans-2017-053264.160   | Population (did not report data from PrEP users) |
| Dubbink, 2016       | Microbiological characteristics of chlamydia trachomatis and neisseria gonorrhoeae infections in South African women                                                  | Journal of Clinical Microbiology                                  | 10.1128/JCM.02848-15               | Population (did not report data from PrEP users) |
| Dukers-Muijrs, 2015 | What is needed to guide testing for anorectal and pharyngeal Chlamydia trachomatis and Neisseria gonorrhoeae in women and men? Evidence and opinion                   | BMC Infectious Diseases                                           | 10.1186/s12879-015-1280-6          | Population (did not report data from PrEP users) |
| Dumke, 2016         | Emergence of Mycoplasma genitalium strains showing mutations associated with macrolide and fluoroquinolone resistance in the region Dresden, Germany                  | Diagnostic Microbiology and Infectious Disease                    | 10.1016/j.diagmicrobio.2016.07.005 | Population (did not report data from PrEP users) |
| Duron, 2018         | Prevalence and risk factors of sexually transmitted infections among French service members                                                                           | PLoS ONE                                                          | 10.1371/journal.pone.0195158       | Population (did not report data from PrEP users) |
| Ebel, 2015          | Prevalence of Mycoplasma genitalium in France and comparison with Chlamydia trachomatis and Neisseria gonorrhoeae using transcriptionmediated amplification assays    | International Journal of STD and AIDS                             | 10.1177/0956462415601768           | Population (did not report data from PrEP users) |
| Edlund, 2012        | The spread of Mycoplasma genitalium among men who have sex with men                                                                                                   | International Journal of STD and AIDS                             | 10.1258/ijsa.2009.009411.          | Population (did not report data from PrEP users) |
| Edouard, 2017       | Mycoplasma genitalium, an agent of reemerging sexually transmitted infections                                                                                         | APMIS                                                             | 10.1111/apm.12731                  | Population (did not report data from PrEP users) |
| Ekiel, 2013         | Urogenital Mycoplasmas and Human Papilloma Virus in Hemodialysed Women                                                                                                | Scientific World Journal                                          | 10.1155/2013/659204                | Population (did not report data from PrEP users) |
| Ekiel, 2016         | Prevalence of Urogenital Mycoplasmas Among Men with NGU in Upper Silesia, Poland. Preliminary Study                                                                   | Pol J Microbiol                                                   | 10.5604/17331331.1197326           | Population (did not report data from PrEP users) |
| El Beayni, 2021     | Molecular prevalence of eight different sexually transmitted infections in a lebanese major tertiary care center: Impact on public health                             | International Journal of Molecular Epidemiology and Genetics      | NR                                 | Population (did not report data from PrEP users) |
| Esen, 2017          | Ureaplasma urealyticum: Presence among Sexually Transmitted Diseases                                                                                                  | Jpn J Infect Dis                                                  | 10.7883/yoken.JJID.2015.258        | Population (did not report data from PrEP users) |
| Ezeanya-Bakpa, 2021 | Sequence analysis reveals asymptomatic infection with Mycoplasma hominis and Ureaplasma urealyticum possibly leads to infertility in females: A cross-sectional study | International Journal of Reproductive Biomedicine                 | 10.18502/ijrm.v19i11.9910          | Population (did not report data from PrEP users) |
| Ezeanya-Bakpa, 2022 | Phylogeny-based identification of Mycoplasma genitalium in a Nigerian population of apparently healthy sexually active female students                                | Pan African Medical Journal                                       | 10.11604/pamj.2022.41.71.19631     | Population (did not report data from PrEP users) |
| Fasciana, 2021      | Socio-demographic characteristics and sexual behavioral factors of patients with sexually transmitted infections attending a hospital in southern Italy               | International Journal of Environmental Research and Public Health | 10.3390/ijerph18094722             | Population (did not report data from PrEP users) |
| Feodorova, 2019     | Enhanced prevalence of chlamydia trachomatis DNA in clinical samples of patients with STIS co-infection                                                               | Sexually Transmitted Infections                                   | 10.1136/sextrans-2019-sti.562      | Population (did not report data from PrEP users) |

|                              |                                                                                                                                                                                                     |                                                              |                                  |                                                  |
|------------------------------|-----------------------------------------------------------------------------------------------------------------------------------------------------------------------------------------------------|--------------------------------------------------------------|----------------------------------|--------------------------------------------------|
| Fernández-Huerta, 2020       | Mycoplasma genitalium and fluoroquinolone resistance detection using a novel qPCR assay in Barcelona, Spain                                                                                         | Enfermedades Infecciosas y Microbiología Clínica             | 10.1016/j.eimc.2019.10.003       | Population (did not report data from PrEP users) |
| Fernández-Huerta, 2020       | Prevalence of Mycoplasma genitalium and macrolide resistance among asymptomatic people visiting a point of care service for rapid STI screening: A cross-sectional study                            | Sexually Transmitted Infections                              | 10.1136/sextrans-2019-054124     | Population (did not report data from PrEP users) |
| Ferré, 2019                  | Prevalence of human papillomavirus, human immunodeficiency virus, and other sexually transmitted infections among men who have sex with men in Togo: A national cross-sectional survey              | Clinical Infectious Diseases                                 | 10.1093/cid/ciy1012              | Population (did not report data from PrEP users) |
| Ferreux, 2018                | Prevalence of Mycoplasma genitalium among infertile men, and sperm donors consulting in a French center for Assisted Reproduction                                                                   | Human Reproduction                                           | 10.1093/humrep/33.Supplement_1.1 | Population (did not report data from PrEP users) |
| Field, 2012                  | Testing for sexually transmitted infections in a population-based sexual health survey: Development of an acceptable ethical approach                                                               | Journal of Medical Ethics                                    | 10.1136/medethics-2011-100068    | Population (did not report data from PrEP users) |
| Fifer, 2021                  | Frequency and Correlates of Mycoplasma genitalium Antimicrobial Resistance Mutations and Their Association With Treatment Outcomes: Findings From a National Sentinel Surveillance Pilot in England | Sexually transmitted diseases                                | 10.1097/OLQ.0000000000001493     | Population (did not report data from PrEP users) |
| Foronda-García-Hidalgo, 2019 | Prevalence among males from the general population of agents responsible of not ulcerative genital tract infections, assisted in specialized care                                                   | Revista Espanola de Quimioterapia                            | NR                               | Population (did not report data from PrEP users) |
| Forslund, 2017               | Mycoplasma genitalium and macrolide resistance-associated mutations in the Skåne Region of Southern Sweden 2015                                                                                     | Acta Dermato-Venereologica                                   | 10.2340/00015555-2746            | Population (did not report data from PrEP users) |
| Foschi, 2018                 | Sexually transmitted rectal infections in a cohort of 'men having sex with men'                                                                                                                     | Journal of Medical Microbiology                              | 10.1099/jmm.0.000781             | Population (did not report data from PrEP users) |
| Fragoso, 2019                | Sexually transmitted diseases clinic in a Portuguese Infectious Diseases unit                                                                                                                       | HIV Medicine                                                 | 10.1111/hiv.12815                | Population (did not report data from PrEP users) |
| Francis, 2019                | Results from a cross-sectional sexual and reproductive health study among school girls in Tanzania: High prevalence of bacterial vaginosis                                                          | Sexually Transmitted Infections                              | 10.1136/sextrans-2018-053680     | Population (did not report data from PrEP users) |
| Frolound, 2018               | The bacterial microbiota in first-void urine from men with and without idiopathic urethritis                                                                                                        | Plos One                                                     | 10.1371/journal.pone.0201380     | Population (did not report data from PrEP users) |
| Frolound, 2019               | Detection of ureaplasmas and bacterial vaginosis associated bacteria and their association with non-gonococcal urethritis in men                                                                    | Plos One                                                     | 10.1371/journal.pone.0214425     | Population (did not report data from PrEP users) |
| Frolova, 2013                | Preconception risk factors in young healthy women: Cross-sectional study                                                                                                                            | BJOG: An International Journal of Obstetrics and Gynaecology | 10.1111/1471-0528.12294          | Population (did not report data from PrEP users) |
| Gabster, 2019                | High prevalence of cervico-vaginal infections among female adolescents in four urban regions of Panama                                                                                              | Sexually Transmitted Infections                              | 10.1136/sextrans-2019-sti.178    | Population (did not report data from PrEP users) |

|                       |                                                                                                                                                                                   |                                             |                                 |                                                  |
|-----------------------|-----------------------------------------------------------------------------------------------------------------------------------------------------------------------------------|---------------------------------------------|---------------------------------|--------------------------------------------------|
| García-González, 2017 | Prevalence of sexually transmitted infections in symptomatic and asymptomatic patients from Yucatan                                                                               | Revista del Laboratorio Clínico             | 10.1016/j.labcli.2017.02.003    | Population (did not report data from PrEP users) |
| Gaydos, 2019          | Molecular Testing for Mycoplasma genitalium in the United States: Results from the AMES Prospective Multicenter Clinical Study                                                    | Journal of Clinical Microbiology            | 10.1128/jcm.01125-19            | Population (did not report data from PrEP users) |
| Gesink-Law, 2010      | MYCOPLASMA GENITALIUM IN GREENLAND: PREVALENCE, MACROLIDE RESISTANCE, ETHICAL CONSIDERATIONS, AND POLICY IMPLICATIONS                                                             | International Journal of Circumpolar Health | NR                              | Population (did not report data from PrEP users) |
| Gesink, 2012          | Mycoplasma genitalium presence, resistance and epidemiology in Greenland                                                                                                          | International journal of circumpolar health | NR                              | Population (did not report data from PrEP users) |
| Gesink, 2016          | Mycoplasma genitalium in Toronto, Ont: Estimates of prevalence and macrolide resistance                                                                                           | Canadian Family Physician                   | NR                              | Population (did not report data from PrEP users) |
| Getman, 2016          | Mycoplasma genitalium prevalence, coinfection, and macrolide antibiotic resistance frequency in a multicenter clinical study cohort in the United States                          | Journal of Clinical Microbiology            | 10.1128/JCM.01053-16            | Population (did not report data from PrEP users) |
| Getman, 2022          | Distribution of Macrolide Resistant Mycoplasma genitalium in Urogenital Tract Specimens from Women Enrolled in a US Clinical Study Cohort                                         | Clinical Infectious Diseases                | 10.1093/cid/ciac602             | Population (did not report data from PrEP users) |
| Gohil, 2021           | MYCOPLASMA GENITALIUM: THE MOST PREVALENT STI IN SASKATCHEWAN, CANADA, HAS A HIGH PREVALENCE OF RESISTANCE TO MACROLIDES AND FLUOROQUINOLONES                                     | Sexually Transmitted Infections             | 10.1136/sextrans-2021-sti.305   | Population (did not report data from PrEP users) |
| Goller, 2017          | Characteristics of pelvic inflammatory disease where no sexually transmitted infection is identified: A cross-sectional analysis of routinely collected sexual health clinic data | Sexually Transmitted Infections             | 10.1136/sextrans-2016-052553    | Population (did not report data from PrEP users) |
| Goller, 2019          | Trends in diagnosis of pelvic inflammatory disease in an Australian sexual health clinic, 2002-16: Before and after clinical audit feedback                                       | Sexual Health                               | 10.1071/SH18119                 | Population (did not report data from PrEP users) |
| Gomih-Alakija, 2014   | Clinical characteristics associated with mycoplasma genitalium among female sex workers in nairobi, Kenya                                                                         | Journal of Clinical Microbiology            | 10.1128/JCM.00850-14            | Population (did not report data from PrEP users) |
| Gonah, 2017           | Mycoplasma genitalium-testing and treating in a level 2 primary care service                                                                                                      | Sexually Transmitted Infections             | 10.1136/sextrans-2017-053232.67 | Population (did not report data from PrEP users) |
| Gong, 2019            | Coping with Risk: Negative Shocks, Transactional Sex, and the Limitations of Conditional Cash Transfers                                                                           | Journal of Health Economics                 | 10.1016/j.jhealeco.2019.06.006  | Population (did not report data from PrEP users) |
| Gottesman, 2017       | Prevalence of Mycoplasma genitalium in men with urethritis and in high risk asymptomatic males in Tel Aviv: a prospective study                                                   | International Journal of STD and AIDS       | 10.1177/0956462416630675        | Population (did not report data from PrEP users) |
| Gragg, 2021           | Mycoplasma genitalium Infection in Young Women Without Urogenital Symptoms Presenting to a Community-Based Emergency Department in Birmingham, Alabama                            | Sexually transmitted diseases               | 10.1097/OLQ.0000000000001227    | Population (did not report data from PrEP users) |
| Gratrix, 2017         | Prevalence and antibiotic resistance of Mycoplasma genitalium among STI clinic attendees in Western Canada: A cross-sectional analysis                                            | BMJ Open                                    | 10.1136/bmjopen-2017-016300     | Population (did not report data from PrEP users) |

|                |                                                                                                                                                                                 |                                            |                                  |                                                  |
|----------------|---------------------------------------------------------------------------------------------------------------------------------------------------------------------------------|--------------------------------------------|----------------------------------|--------------------------------------------------|
| Gravitt, 2016  | Prevalence of sexually transmitted infections and coinfection in a population-based sample of women attending cervical cancer screening in New Mexico, United States of America | Open Forum Infectious Diseases             | 10.1093/ofid/ofw172.1003         | Population (did not report data from PrEP users) |
| Guiraud, 2022  | Molecular Typing Reveals Distinct Mycoplasma genitalium Transmission Networks among a Cohort of Men Who Have Sex with Men and a Cohort of Women in France                       | Microorganisms                             | 10.3390/microorganisms10081587   | Population (did not report data from PrEP users) |
| Gumede, 2017   | Predictors of sexually transmitted coinfections in women presenting with bacterial vaginosis to primary healthcare facilities in South Africa                                   | Sexually Transmitted Infections            | 10.1136/sextrans-2017-053264.370 | Population (did not report data from PrEP users) |
| Gundevia, 2015 | Positivity at test of cure following first-line treatment for genital Mycoplasma genitalium: Follow-up of a clinical cohort                                                     | Sexually Transmitted Infections            | 10.1136/sextrans-2014-051616     | Population (did not report data from PrEP users) |
| Guschin, 2022  | Sexually transmitted co-infections in men who have sex with men                                                                                                                 | Klinicheskaya Dermatologiya i Venerologiya | 10.17116/klinderma202221041502   | Population (did not report data from PrEP users) |
| Hagemann, 2014 | Sexually transmitted infections among women attending a Norwegian Sexual Assault Centre                                                                                         | Sexually Transmitted Infections            | 10.1136/sextrans-2013-051328     | Population (did not report data from PrEP users) |
| Haggerty, 2014 | Pelvic inflammatory disease: Clinical trends and improving imprecision                                                                                                          | Sexually Transmitted Diseases              | NR                               | Population (did not report data from PrEP users) |
| Haggerty, 2020 | Presence and Concentrations of Select Bacterial Vaginosis-Associated Bacteria Are Associated with Increased Risk of Pelvic Inflammatory Disease                                 | Sexually Transmitted Diseases              | 10.1097/OLQ.0000000000001164     | Population (did not report data from PrEP users) |
| Hahn, 2021     | Testing as prevention of resistance in bacteria causing sexually transmitted infections—a population-based model for Germany                                                    | Antibiotics                                | 10.3390/antibiotics10080929      | Population (did not report data from PrEP users) |
| Ham, 2015      | HIV and STIs among transgendered populations: Four country survey from central America                                                                                          | Topics in Antiviral Medicine               | NR                               | Population (did not report data from PrEP users) |
| Hamill, 2021   | Ugandan men with urethritis, what can diagnostic certainty tell us?                                                                                                             | Sexually Transmitted Infections            | 10.1136/sextrans-2021-sti.323    | Population (did not report data from PrEP users) |
| Hamill, 2022   | High burden of untreated syphilis, drug resistant Neisseria gonorrhoeae, and other sexually transmitted infections in men with urethral discharge syndrome in Kampala, Uganda   | BMC Infect Dis                             | 10.1186/s12879-022-07431-1       | Population (did not report data from PrEP users) |
| Hammer, 2021   | Burden of Mycoplasma genitalium and Bacterial Coinfections in a Population-Based Sample in New Mexico                                                                           | Sexually transmitted diseases              | 10.1097/OLQ.0000000000001472     | Population (did not report data from PrEP users) |
| Han, 2015      | Unusually low prevalence of mycoplasma genitalium and trichomonas vaginalis in urine samples from Chinese women attending a centre of prenatal diagnosis                        | Sexually Transmitted Infections            | 10.1136/sextrans-2015-052270.389 | Population (did not report data from PrEP users) |
| Han, 2021      | Rectal mycoplasma genitalium in patients attending sexually transmitted disease clinics in China: An infection that cannot be ignored                                           | Infection and Drug Resistance              | 10.2147/IDR.S314775              | Population (did not report data from PrEP users) |
| Hanna, 2020    | Molecular epidemiology and socio-demographic risk factors of sexually transmitted infections among women in Lebanon                                                             | BMC Infectious Diseases                    | 10.1186/s12879-020-05066-8       | Population (did not report data from PrEP users) |

|                     |                                                                                                                                                                                                                                                           |                                       |                                  |                                                  |
|---------------------|-----------------------------------------------------------------------------------------------------------------------------------------------------------------------------------------------------------------------------------------------------------|---------------------------------------|----------------------------------|--------------------------------------------------|
| Harling, 2020       | Effect of weighting for sampling and non-response on estimates of STI prevalence in the third British National Survey of Sexual Attitudes and Lifestyles (Natsal-3)                                                                                       | Sexually Transmitted Infections       | 10.1136/sextrans-2019-054342     | Population (did not report data from PrEP users) |
| Harrison, 2019      | Impact of mass drug administration of azithromycin for trachoma elimination on prevalence and azithromycin resistance of genital <i>Mycoplasma genitalium</i> infection                                                                                   | Sexually Transmitted Infections       | 10.1136/sextrans-2018-053938     | Population (did not report data from PrEP users) |
| Harrison, 2019      | <i>Mycoplasma genitalium</i> Coinfection in Women With Chlamydia trachomatis Infection                                                                                                                                                                    | Sexually Transmitted Diseases         | 10.1097/OLQ.000000000001028      | Population (did not report data from PrEP users) |
| Hart, 2020          | <i>Mycoplasma genitalium</i> in Singapore is associated with Chlamydia trachomatis infection and displays high macrolide and Fluoroquinolone resistance rates                                                                                             | BMC Infectious Diseases               | 10.1186/s12879-020-05019-1       | Population (did not report data from PrEP users) |
| Hay, 2015           | Prevalence and macrolide resistance of <i>mycoplasma genitalium</i> in South African women                                                                                                                                                                | Sexually Transmitted Diseases         | 10.1097/OLQ.0000000000000246     | Population (did not report data from PrEP users) |
| Hay, 2016           | Which sexually active young female students are most at risk of pelvic inflammatory disease? A prospective study                                                                                                                                          | Sex Transm Infect                     | 10.1136/sextrans-2015-052063     | Population (did not report data from PrEP users) |
| Henning, 2014       | Asymptomatic <i>Mycoplasma genitalium</i> infection amongst marginalised young people accessing a youth health service in Melbourne                                                                                                                       | International Journal of STD and AIDS | 10.1177/0956462413502317         | Population (did not report data from PrEP users) |
| Henning, 2021       | Homelessness, sex and a tale of two sexually transmitted infections                                                                                                                                                                                       | International Journal of STD and AIDS | 10.1177/0956462420958904         | Population (did not report data from PrEP users) |
| Hernandez, 2011     | High incidence of HIV and low HIV prevention coverage among men who have sex with men in Managua, Nicaragua                                                                                                                                               | Sexually Transmitted Infections       | 10.1136/sextrans-2011-050108.112 | Population (did not report data from PrEP users) |
| Hetem, 2021         | High prevalence and resistance rates of <i>Mycoplasma genitalium</i> among patients visiting two sexually transmitted infection clinics in the Netherlands                                                                                                | International Journal of STD and AIDS | 10.1177/0956462421999287         | Population (did not report data from PrEP users) |
| Hilmarsdóttir, 2020 | Prevalence of <i>mycoplasma genitalium</i> and antibiotic resistance-associated mutations in patients at a sexually transmitted infection clinic in Iceland, and comparison of the s-diamgtv and aptima <i>mycoplasma genitalium</i> assays for diagnosis | Journal of Clinical Microbiology      | 10.1128/JCM.01084-20             | Population (did not report data from PrEP users) |
| Hoffman, 2019       | Provision of Sexually Transmitted Infection Services in a Mobile Clinic Reveals High Unmet Need in Remote Areas of South Africa: A Cross-sectional Study                                                                                                  | Sexually Transmitted Diseases         | 10.1097/OLQ.0000000000000931     | Population (did not report data from PrEP users) |
| Hokynar, 2018       | Prevalence of <i>Mycoplasma genitalium</i> and mutations associated with macrolide and fluoroquinolone resistance in Finland                                                                                                                              | International Journal of STD and AIDS | 10.1177/0956462418764482         | Population (did not report data from PrEP users) |
| Homfray, 2015       | Male circumcision and STI acquisition in Britain: Evidence from a national probability sample survey                                                                                                                                                      | PLoS ONE                              | 10.1371/journal.pone.0130396     | Population (did not report data from PrEP users) |
| Horseman, 2021      | Prevalence and Epidemiology of <i>Mycoplasma genitalium</i> in a Pacific-Region Military Population                                                                                                                                                       | Sexually Transmitted Diseases         | 10.1097/OLQ.0000000000001393     | Population (did not report data from PrEP users) |

|                  |                                                                                                                                                                                                                   |                                                                   |                                  |                                                             |
|------------------|-------------------------------------------------------------------------------------------------------------------------------------------------------------------------------------------------------------------|-------------------------------------------------------------------|----------------------------------|-------------------------------------------------------------|
| Howard, 2022     | AUDIT OF MYCOPLASMA GENITALIUM MANAGEMENT: CHALLENGES IN A LONDON CLINIC                                                                                                                                          | Sexually Transmitted Infections                                   | 10.1136/sextrans-BASHH-2022.113  | Population (did not report data from PrEP users)            |
| Htun, 2022       | CHARACTERISTICS OF MYCOPLASMA GENITALIUM IN A UK SEXUAL HEALTH CLINIC                                                                                                                                             | Sexually Transmitted Infections                                   | 10.1136/sextrans-BASHH-2022.114  | Outcome (report results in number of samples, not patients) |
| Htun, 2022       | REVIEW OF MYCOPLASMA GENITALIUM POSITIVE CASES IN A UK SEXUAL HEALTH CLINIC                                                                                                                                       | Sexually Transmitted Infections                                   | 10.1136/sextrans-BASHH-2022.20   | Population (did not report the number of patients on PrEP)  |
| Hu, 2022         | Prevalence of Mycoplasma Genitalium Infection and Resistance in Pregnant Women                                                                                                                                    | American Journal of Obstetrics and Gynecology                     | 10.1016/j.ajog.2021.11.1283      | Population (did not report data from PrEP users)            |
| Huppert, 2013    | Abnormal Vaginal pH and Mycoplasma genitalium Infection                                                                                                                                                           | Journal of Pediatric and Adolescent Gynecology                    | 10.1016/j.jpog.2012.09.005       | Population (did not report data from PrEP users)            |
| Ikonomidis, 2016 | Prevalence of Chlamydia trachomatis, Ureaplasma spp., Mycoplasma genitalium and Mycoplasma hominis among outpatients in central Greece: Absence of tetracycline resistance gene tet(M) over a 4-year period study | New Microbes and New Infections                                   | 10.1016/j.nmni.2015.11.005       | Population (did not report data from PrEP users)            |
| Ito, 2012        | Prevalence of genital mycoplasmas and ureaplasmas in men younger than 40 years-of-age with acute epididymitis                                                                                                     | International Journal of Urology                                  | 10.1111/j.1442-2042.2011.02917.x | Population (did not report data from PrEP users)            |
| Ito, 2014        | Prevalence of genital mycoplasmas in asymptomatic male partners of women diagnosed as having chlamydial infections                                                                                                | Journal of Infection and Chemotherapy                             | 10.1016/j.jiac.2013.07.011       | Population (did not report data from PrEP users)            |
| Ito, 2016        | Male non-gonococcal urethritis: From microbiological etiologies to demographic and clinical features                                                                                                              | Int J Urol                                                        | 10.1111/iju.13044                | Population (did not report data from PrEP users)            |
| Jalal, 2013      | Molecular epidemiology of selected sexually transmitted infections                                                                                                                                                | International Journal of Molecular Epidemiology and Genetics      | NR                               | Population (did not report data from PrEP users)            |
| Jary, 2021       | Prevalence of cervical HPV infection, sexually transmitted infections and associated antimicrobial resistance in women attending cervical cancer screening in Mali                                                | International Journal of Infectious Diseases                      | 10.1016/j.ijid.2021.06.024       | Population (did not report data from PrEP users)            |
| Jenniskens, 2017 | Routine testing of Mycoplasma genitalium and Trichomonas vaginalis                                                                                                                                                | Infectious Diseases                                               | 10.1080/23744235.2017.1290271    | Population (did not report data from PrEP users)            |
| Jensen, 2013     | Chlamydia trachomatis, Mycoplasma genitalium and Ureaplasma urealyticum among students in northern Norway                                                                                                         | Journal of the European Academy of Dermatology and Venereology    | 10.1111/j.1468-3083.2012.04528.x | Population (did not report data from PrEP users)            |
| Jiang, 2015      | The prevalence of mycoplasma genitalium and chlamydia trachomatis at various anatomical sites of men who have sex with men in five cities of china                                                                | Sexually Transmitted Infections                                   | 10.1136/sextrans-2015-052270.93  | Population (did not report data from PrEP users)            |
| Jin, 2021        | Human papillomavirus prevalence in urine samples of asymptomatic male sexual partners of women with sexually transmitted diseases                                                                                 | International Journal of Environmental Research and Public Health | 10.3390/ijerph182111706          | Population (did not report data from PrEP users)            |

|                |                                                                                                                                                                                                 |                                                   |                                 |                                                  |
|----------------|-------------------------------------------------------------------------------------------------------------------------------------------------------------------------------------------------|---------------------------------------------------|---------------------------------|--------------------------------------------------|
| Jobe, 2014     | Epidemiology of sexually transmitted infections in rural southwestern Haiti: The grand'anse women's health study                                                                                | American Journal of Tropical Medicine and Hygiene | 10.4269/ajtmh.13-0762           | Population (did not report data from PrEP users) |
| Johnston, 2012 | High prevalence of Mycoplasma genitalium among female sex workers in honduras: Implications for the spread of HIV and other sexually transmitted infections                                     | International Journal of STD and AIDS             | 10.1258/ijsa.2009.009446        | Population (did not report data from PrEP users) |
| Jonduo, 2022   | Mycoplasma genitalium macrolide and fluoroquinolone resistance in pregnant women in Papua New Guinea                                                                                            | Sexually Transmitted Infections                   | 10.1136/sextrans-2022-055552    | Population (did not report data from PrEP users) |
| Jordan, 2019   | Prevalence and etiology of post-azithromycin persistent non-gonococcal urethritis (NGU) symptoms in men                                                                                         | Sexually Transmitted Infections                   | 10.1136/sextrans-2019-sti.849   | Population (did not report data from PrEP users) |
| Jordan, 2020   | Aetiology and prevalence of mixed-infections and mono-infections in non-gonococcal urethritis in men: A case-control study                                                                      | Sexually Transmitted Infections                   | 10.1136/sextrans-2019-054121    | Population (did not report data from PrEP users) |
| Juliana, 2020  | The prevalence of chlamydia trachomatis and three other non-viral sexually transmitted infections among pregnant women in pemba island tanzania                                                 | Pathogens                                         | 10.3390/pathogens9080625        | Population (did not report data from PrEP users) |
| Juliana, 2021  | The Natural Course of Chlamydia trachomatis, Neisseria gonorrhoeae, Trichomonas vaginalis, and Mycoplasma genitalium in Pregnant and Post-Delivery Women in Pemba Island, Tanzania              | Microorganisms                                    | 10.3390/microorganisms9061180   | Population (did not report data from PrEP users) |
| Juliana, 2021  | Vaginal microbiota characteristics and genital infections among pregnant women in Pemba Island, Tanzania                                                                                        | Sexually Transmitted Infections                   | 10.1136/sextrans-2021-sti.179   | Population (did not report data from PrEP users) |
| Justel, 2015   | Vertical transmission of bacterial eye infections, Angola, 2011-2012                                                                                                                            | Emerg Infect Dis                                  | 10.3201/eid2103.140312          | Population (did not report data from PrEP users) |
| Kaida, 2016    | High burden of asymptomatic genital tract infections among sexually active South African youth: considerations for HIV prevention programs                                                      | AIDS Research and Human Retroviruses              | 10.1089/aid.2016.5000.abstracts | Population (did not report data from PrEP users) |
| Kaida, 2018    | A high burden of asymptomatic genital tract infections undermines the syndromic management approach among adolescents and young adults in South Africa: Implications for HIV prevention efforts | BMC Infectious Diseases                           | 10.1186/s12879-018-3380-6       | Population (did not report data from PrEP users) |
| Karim, 2021    | Bacterial sexually transmitted infections and syndromic approach: a study conducted on women at Moroccan University Hospital                                                                    | GERMS                                             | 10.18683/germs.2021.1289        | Population (did not report data from PrEP users) |
| Kazemian, 2022 | The prevalence of gonococcal and non-gonococcal infections in women referred to obstetrics and gynecology clinics                                                                               | Infezioni in Medicina                             | 10.53854/liim-3002-10           | Population (did not report data from PrEP users) |
| Kenyon, 2021   | The Population-Level Effect of Screening for Mycoplasma genitalium on Antimicrobial Resistance: A Quasi-Experimental Study                                                                      | Sexually Transmitted Diseases                     | 10.1097/OLQ.0000000000001404    | Outcome                                          |
| Kharsany, 2020 | Population prevalence of sexually transmitted infections in a high HIV burden district in KwaZulu-Natal, South Africa: Implications for HIV epidemic control                                    | International Journal of Infectious Diseases      | 10.1016/j.ijid.2020.06.046      | Population (did not report data from PrEP users) |
| Khatib, 2015   | Prevalence of Trichomonas vaginalis, Mycoplasma genitalium and Ureaplasma urealyticum in men with urethritis attending an urban sexual health clinic                                            | International Journal of STD and AIDS             | 10.1177/0956462414539464        | Population (did not report data from PrEP users) |



|                  |                                                                                                                                                                                                              |                                                      |                                |                                                  |
|------------------|--------------------------------------------------------------------------------------------------------------------------------------------------------------------------------------------------------------|------------------------------------------------------|--------------------------------|--------------------------------------------------|
| Khattab, 2016    | Study of the prevalence and association of ocular chlamydial conjunctivitis in women with genital infection by Chlamydia trachomatis, Mycoplasma genitalium and Candida albicans attending outpatient clinic | International Journal of Ophthalmology               | 10.18240/ijo.2016.08.15        | Population (did not report data from PrEP users) |
| Khosropour, 2014 | Suboptimal adherence to doxycycline and treatment outcomes among men with non-gonococcal urethritis: A prospective cohort study                                                                              | Sexually Transmitted Infections                      | 10.1136/sextrans-2013-051174   | Population (did not report data from PrEP users) |
| Khosropour, 2020 | High Prevalence of Vaginal and Rectal Mycoplasma genitalium Macrolide Resistance among Female Sexually Transmitted Disease Clinic Patients in Seattle, Washington                                            | Sexually Transmitted Diseases                        | 10.1097/OLQ.0000000000001148   | Population (did not report data from PrEP users) |
| Khryanin, 2011   | The detection rate of chlamydia trachomatis and mycoplasma genitalium infections in std clinics in novosibirsk, Russian federation                                                                           | Sexually Transmitted Infections                      | 10.1136/sextrans-2011-050108.5 | Population (did not report data from PrEP users) |
| Khryanin, 2012   | Detection rates of Mycoplasma genitalium and Chlamydia trachomatis infections in Novosibirsk, Siberia, in 2010-2011                                                                                          | Sex Transm Infect                                    | 10.1136/sextrans-2012-050596   | Population (did not report data from PrEP users) |
| Kim, 2011        | The prevalence and clinical significance of urethritis and cervicitis in asymptomatic people by use of multiplex polymerase chain reaction                                                                   | Korean Journal of Urology                            | 10.4111/kju.2011.52.10.703     | Population (did not report data from PrEP users) |
| Kim, 2013        | Epidemiological trends of sexually transmitted infections among women in cheonan, south korea, 2006-2012                                                                                                     | Journal of Microbiology and Biotechnology            | 10.4014/jmb.1306.06055         | Population (did not report data from PrEP users) |
| Kim, 2013        | The prevalence of sexually transmitted infections detected by nucleic acid amplification tests in symptomatic patients and asymptomatic volunteers                                                           | International Journal of Antimicrobial Agents        | 10.1016/S0924-8579(13)70455-2  | Population (did not report data from PrEP users) |
| Kim, 2014        | Prevalence of sexually transmitted infections among healthy Korean women: Implications of multiplex PCR pathogen detection on antibiotic therapy                                                             | Journal of Infection and Chemotherapy                | 10.1016/j.jiac.2013.08.005     | Population (did not report data from PrEP users) |
| Kim, 2017        | Effects of infections with five sexually transmitted pathogens on sperm quality                                                                                                                              | Clinical and Experimental Reproductive Medicine-Cerm | 10.5653/cerm.2017.44.4.207     | Population (did not report data from PrEP users) |
| Kim, 2017        | The prevalence of causative organisms of community-acquired urethritis in an age group at high risk for sexually transmitted infections in Korean Soldiers                                                   | Journal of the Royal Army Medical Corps              | 10.1136/jramc-2015-000488      | Population (did not report data from PrEP users) |
| Kim, 2018        | Co-infection Of Ureaplasma urealyticum And Human Papilloma Virus In Asymptomatic Sexually Active Individuals                                                                                                 | International Journal of Medical Sciences            | 10.7150/ijms.26523             | Population (did not report data from PrEP users) |
| Kim, 2019        | Sexual behavior and sexually transmitted infection in the elderly population of south korea                                                                                                                  | Investigative and Clinical Urology                   | 10.4111/icu.2019.60.3.202      | Population (did not report data from PrEP users) |
| Kitaya, 2016     | Chronic Endometritis: Potential Cause of Infertility and Obstetric and Neonatal Complications                                                                                                                | American Journal of Reproductive Immunology          | 10.1111/aji.12438              | Population (did not report data from PrEP users) |
| Klavs, 2019      | Prevalence of chlamydia, Gonorrhoea, M. Genitalium and T. Vaginalis in the general population of Slovenia, 2016-2017                                                                                         | Sexually Transmitted Infections                      | 10.1136/sextrans-2019-sti.472  | Population (did not report data from PrEP users) |

|                 |                                                                                                                                                                                                                                                        |                                                                                                                |                                         |                                                  |
|-----------------|--------------------------------------------------------------------------------------------------------------------------------------------------------------------------------------------------------------------------------------------------------|----------------------------------------------------------------------------------------------------------------|-----------------------------------------|--------------------------------------------------|
| Klavs, 2022     | Prevalence of sexually transmitted infections with Chlamydia trachomatis, Neisseria gonorrhoeae, Mycoplasma genitalium and Trichomonas vaginalis: findings from the National Survey of Sexual Lifestyles, Attitudes and Health, Slovenia, 2016 to 2017 | Euro surveillance : bulletin Europeen sur les maladies transmissibles = European communicable disease bulletin | 10.2807/1560-7917.ES.2022.27.14.2100284 | Population (did not report data from PrEP users) |
| Klein, 2019     | Relationship between the Cervical Microbiome, HIV Status, and Precancerous Lesions                                                                                                                                                                     | Mbio                                                                                                           | 10.1128/mBio.02785-18                   | Population (did not report data from PrEP users) |
| Klein, 2020     | Mycoplasma co-infection is associated with cervical cancer risk                                                                                                                                                                                        | Cancers                                                                                                        | 10.3390/cancers12051093                 | Population (did not report data from PrEP users) |
| Klepac, 2021    | Prevalence of and risk factors for sexually transmitted infection with Chlamydia trachomatis to guide control measures: findings from the Slovenian National Survey of Sexual Lifestyles, Attitudes, and Health in 2016–2017                           | Acta Dermatovenerologica Alpina, Pannonica et Adriatica                                                        | 10.15570/actaapa.2021.34                | Population (did not report data from PrEP users) |
| Kofler, 2020    | The role of hpv and non-hpv sexually transmitted infections in patients with oropharyngeal carcinoma: A case control study                                                                                                                             | Cancers                                                                                                        | 10.3390/cancers12051192                 | Population (did not report data from PrEP users) |
| Kogoj, 2018     | Epidemiology of Chlamydia trachomatis, Neisseria gonorrhoeae, and urogenital mycoplasma infections in central Slovenia                                                                                                                                 | Clinical Chemistry and Laboratory Medicine                                                                     | 10.1515/cclm-2018-0281                  | Population (did not report data from PrEP users) |
| Korhonen, 2019  | The Prevalence of HSV, HHV-6, HPV and Mycoplasma genitalium in Chlamydia trachomatis positive and Chlamydia trachomatis Negative Urogenital Samples among Young Women in Finland                                                                       | Pathogens                                                                                                      | 10.3390/pathogens8040276                | Population (did not report data from PrEP users) |
| Kostera, 2020   | Demographics and population epidemiology of mycoplasma genitalium infection: Correlation to co-infection and prior STI history                                                                                                                         | Open Forum Infectious Diseases                                                                                 | 10.1093/ofid/ofaa439.1712               | Population (did not report data from PrEP users) |
| Kostera, 2021   | Prevalence and epidemiological factors associated with trichomonas vaginalis infection in a us multicenter STI clinical study                                                                                                                          | Sexually Transmitted Infections                                                                                | 10.1136/sextrans-2021-sti.233           | Population (did not report data from PrEP users) |
| Kriesel, 2016   | Multiplex PCR testing for nine different sexually transmitted infections                                                                                                                                                                               | Int J STD AIDS                                                                                                 | 10.1177/0956462415615775                | Population (did not report data from PrEP users) |
| Krotik, 2021    | CHARACTERISTICS OF THE VAGINAL MICROBIOTA, CERVICAL AND UTERINE FLORA IN WOMEN WITH THE PAST HISTORY OF SEXUALLY TRANSMITTED INFECTIONS                                                                                                                | Wiadomosci lekarskie (Warsaw, Poland : 1960)                                                                   | 10.36740/wlek202104116                  | Population (did not report data from PrEP users) |
| Kufa, 2018      | The demographic and clinical profiles of women presenting with vaginal discharge syndrome at primary care facilities in South Africa: Associations with age and implications for management                                                            | S. Afr. med. j. (Online)                                                                                       | NR                                      | Population (did not report data from PrEP users) |
| Kularatne, 2022 | Etiological Surveillance of Male Urethritis Syndrome in South Africa: 2019 to 2020                                                                                                                                                                     | Sexually Transmitted Diseases                                                                                  | 10.1097/OLQ.0000000000001647            | Population (did not report data from PrEP users) |
| Kumar, 2011     | Aetiology of urethral discharge syndrome and its association with sexual practices among males attending STI clinics in India                                                                                                                          | Sexually Transmitted Infections                                                                                | 10.1136/sextrans-2011-050108.420        | Population (did not report data from PrEP users) |
| Kwan, 2022      | Frequency of sexually transmitted organisms in pelvic infections and their response to treatment                                                                                                                                                       | Medical Journal of Malaysia                                                                                    | NR                                      | Population (did not report data from PrEP users) |

|                 |                                                                                                                                                                           |                                                                                 |                                   |                                                             |
|-----------------|---------------------------------------------------------------------------------------------------------------------------------------------------------------------------|---------------------------------------------------------------------------------|-----------------------------------|-------------------------------------------------------------|
| Kye-Hyun, 2012  | Vaginal Candida and Microorganisms Related to Sexual Transmitted Diseases in Women with Symptoms of Vaginitis                                                             | Korean Journal of Clinical Microbiology                                         | NR                                | Population (did not report data from PrEP users)            |
| Lallemand, 2015 | Prevalence of mycoplasma genitalium in patients visiting HIV counselling institutions in north-rhine-westphalia, Germany (STI-hit study)                                  | Sexually Transmitted Infections                                                 | 10.1136/sextrans-2015-052270.391  | Population (did not report data from PrEP users)            |
| Lapii, 2019     | Ultrastructural Analysis of Urethral Polyps against the Background of Urogenital Infection                                                                                | Bull Exp Biol Med                                                               | 10.1007/s10517-019-04625-7        | Population (did not report data from PrEP users)            |
| Latif, 2020     | Relationship between lead contaminations with the cervical inflammatory in iraqi women of baghdad                                                                         | Biochemical and Cellular Archives                                               | NR                                | Population (did not report data from PrEP users)            |
| Latimer, 2019   | Clinical Features and Therapeutic Response in Women Meeting Criteria for Presumptive Treatment for Pelvic Inflammatory Disease Associated with Mycoplasma genitalium      | Sexually Transmitted Diseases                                                   | 10.1097/OLQ.0000000000000924      | Population (did not report data from PrEP users)            |
| Latimer, 2019   | Extragenital mycoplasma genitalium infections amongst men who have sex with men                                                                                           | Sexually Transmitted Infections                                                 | 10.1136/sextrans-2019-sti.115     | Outcome (report results in number of samples, not patients) |
| Latimer, 2021   | The clinical indications for testing women for Mycoplasma genitalium                                                                                                      | Sexually Transmitted Infections                                                 | 10.1136/sextrans-2020-054818      | Population (did not report data from PrEP users)            |
| Lau, 2021       | A cross-sectional study on the relationship between endocervical polymorphonuclear cell counts and chlamydial cervicitis in female patients in Hong Kong                  | Hong Kong Journal of Dermatology & Venereology                                  | NR                                | Population (did not report data from PrEP users)            |
| Le Roux, 2017   | PREVALENCE AND MOLECULAR ANALYSIS OF MYCOPLASMA GENITALIUM STRAINS ISOLATED FROM PREGNANT WOMEN AT AN ACADEMIC HOSPITAL IN PRETORIA, SOUTH AFRICA                         | Sexually Transmitted Infections                                                 | 10.1136/sextrans-2017-053264.145  | Population (did not report data from PrEP users)            |
| Le Roux, 2017   | Quantitative Real-Time Polymerase Chain Reaction for the Diagnosis of Mycoplasma genitalium Infection in South African Men with and Without Symptoms of Urethritis        | Sexually Transmitted Diseases                                                   | 10.1097/OLQ.0000000000000540      | Population (did not report data from PrEP users)            |
| Le Roy, 2016    | Fluoroquinolone-resistant mycoplasma genitalium, Southwestern France                                                                                                      | Emerging Infectious Diseases                                                    | 10.3201/eid2209.160446            | Population (did not report data from PrEP users)            |
| Le, 2017        | The detection of microorganisms related to urethritis from the oral cavity of male patients with urethritis                                                               | Journal of Infection and Chemotherapy                                           | 10.1016/j.jiac.2017.06.011        | Population (did not report data from PrEP users)            |
| Le, 2022        | Ureaplasma urealyticum and Mycoplasma genitalium detection and sperm quality: A cross-sectional study in Vietnam                                                          | International Journal of Reproductive BioMedicine                               | 10.18502/ijrm.v20i3.10710         | Population (did not report data from PrEP users)            |
| Lee, 2016       | The evaluation and risk assessment of sexually transmitted disease in Korean adolescents at risk                                                                          | International Journal of Infectious Diseases                                    | 10.1016/j.ijid.2016.02.465        | Population (did not report data from PrEP users)            |
| Lee, 2021       | Emergence of antibiotic-resistant Mycoplasma genitalium as the cause of non-gonococcal urethritis in male patients at a sexually transmitted infection clinic             | Int J Antimicrob Agents                                                         | 10.1016/j.ijantimicag.2021.106510 | Population (did not report data from PrEP users)            |
| Lee, 2022       | Performance of two commercial multiplex polymerase chain reaction assays for the etiological diagnosis of sexually transmitted infections among men who have sex with men | Journal of microbiology, immunology, and infection = Wei mian yu gan ran za zhi | 10.1016/j.jmii.2022.08.009        | Population (did not report data from PrEP users)            |

|                |                                                                                                                                                                                                                                                          |                                                   |                                   |                                                  |
|----------------|----------------------------------------------------------------------------------------------------------------------------------------------------------------------------------------------------------------------------------------------------------|---------------------------------------------------|-----------------------------------|--------------------------------------------------|
| Lee, NR        | Coinfections with multiple sexually transmitted pathogens in Republic of Korea, 2018-2020                                                                                                                                                                | Journal of Clinical Laboratory Analysis           | 10.1002/jcla.24682                | Population (did not report data from PrEP users) |
| Lefebvre, 2017 | Prevalence of mycoplasma genitalium infection and relationship with symptoms among adults attending a sexual health centre                                                                                                                               | Acta Dermato-Venereologica                        | 10.2340/00015555-2585             | Population (did not report data from PrEP users) |
| Leli, 2018     | Prevalence of cervical colonization by Ureaplasma parvum, Ureaplasma urealyticum, Mycoplasma hominis and Mycoplasma genitalium in childbearing age women by a commercially available multiplex real-time PCR: An Italian observational multicentre study | Journal of Microbiology, Immunology and Infection | 10.1016/j.jmii.2017.05.004        | Population (did not report data from PrEP users) |
| Leon, 2016     | Molecular detection of sexually transmitted agents in a symptomatic group of men and its relationship with sexual behavior                                                                                                                               | Revista Chilena De Infectologia                   | 10.4067/s0716-10182016000500003   | Population (did not report data from PrEP users) |
| Lewis, 2011    | Trends in the aetiology of sexually transmitted infections and HIV coinfections among STI patients attending alexandra health centre, Johannesburg, South Africa (2007-2010)                                                                             | Sexually Transmitted Infections                   | 10.1136/sextrans-2011-050108.9    | Population (did not report data from PrEP users) |
| Lewis, 2012    | Prevalence and associations of genital ulcer and urethral pathogens in men presenting with genital ulcer syndrome to primary health care clinics in South Africa                                                                                         | Sexually Transmitted Diseases                     | 10.1097/OLQ.0b013e318269cf90      | Population (did not report data from PrEP users) |
| Lewis, 2013    | Trends and associations of Neisseria Gonorrhoeae infection in men and women with genital discharge syndromes in Johannesburg, South Africa                                                                                                               | Sexually Transmitted Infections                   | 10.1136/sextrans-2013-051184.0739 | Population (did not report data from PrEP users) |
| Lewis, 2019    | Estimating population burden of pelvic inflammatory disease due to mycoplasma genitalium in England: An evidence synthesis                                                                                                                               | Sexually Transmitted Infections                   | 10.1136/sextrans-2019-sti.671     | Population (did not report data from PrEP users) |
| Lewis, 2020    | Incidence of pelvic inflammatory disease associated with mycoplasma genitalium infection: Evidence synthesis of cohort study data                                                                                                                        | Clinical Infectious Diseases                      | 10.1093/cid/ciaa419               | Population (did not report data from PrEP users) |
| Li, 2018       | THE HIGH MACROLIDE RESISTANCE IN GENITAL TRACT INFECTION OF CHINESE INFERTILE POPULATION SHOULD RECEIVE MORE ATTENTION                                                                                                                                   | Fertility and Sterility                           | NR                                | Population (did not report data from PrEP users) |
| Li, 2020       | Mycoplasma genitalium in symptomatic male urethritis: Macrolide use is associated with increased resistance                                                                                                                                              | Clinical Infectious Diseases                      | 10.1093/cid/ciz294                | Population (did not report data from PrEP users) |
| Li, 2020       | Mycoplasma genitalium incidence, treatment failure, and resistance: a retrospective survey of men of infertile couples from a hospital in China                                                                                                          | Andrology                                         | 10.1111/andr.12646                | Population (did not report data from PrEP users) |
| Li, NR         | Rapid Detection of Antimicrobial Resistance in Mycoplasma genitalium by High-Resolution Melting Analysis with Unlabeled Probes                                                                                                                           | Microbiology Spectrum                             | 10.1128/spectrum.01014-22         | Population (did not report data from PrEP users) |
| Libois, 2015   | Prevalence of Mycoplasma genitalium in men with urethritis in a large hospital in Brussels, Belgium                                                                                                                                                      | International Journal of STD and AIDS             | 10.1177/0956462415601768          | Population (did not report data from PrEP users) |
| Libois, 2018   | Prevalence of Mycoplasma genitalium in men with urethritis in a large public hospital in Brussels, Belgium: An observational, cross-sectional study                                                                                                      | Plos One                                          | 10.1371/journal.pone.0196217      | Population (did not report data from PrEP users) |

|                      |                                                                                                                                                                                                                 |                                                  |                              |                                                  |
|----------------------|-----------------------------------------------------------------------------------------------------------------------------------------------------------------------------------------------------------------|--------------------------------------------------|------------------------------|--------------------------------------------------|
| Lillis, 2011         | Utility of Urine, Vaginal, Cervical, and Rectal Specimens for Detection of Mycoplasma genitalium in Women                                                                                                       | Journal of Clinical Microbiology                 | 10.1128/jcm.00129-11         | Population (did not report data from PrEP users) |
| Lillis, 2019         | Mycoplasma genitalium Infections in Women Attending a Sexually Transmitted Disease Clinic in New Orleans                                                                                                        | Clinical Infectious Diseases                     | 10.1093/cid/ciy922           | Population (did not report data from PrEP users) |
| Lima, 2018           | Sexually Transmitted Infections Detected by Multiplex Real Time PCR in Asymptomatic Women and Association with Cervical Intraepithelial Neoplasia                                                               | Revista Brasileira De Ginecologia E Obstetricia  | 10.1055/s-0038-1669994       | Population (did not report data from PrEP users) |
| Limin, 2012          | Clinical analysis of mycoplasma infection and female associated diseases                                                                                                                                        | Chinese Journal of Postgraduates of Medicine     | NR                           | Full text not found                              |
| Liu, 2020            | HIV prevalence among 338,432 infertile individuals in Hunan, China, 2012-2018: A cross-sectional study                                                                                                          | PLoS ONE                                         | 10.1371/journal.pone.0238564 | Population (did not report data from PrEP users) |
| Liu, 2022            | Analysis of Ureaplasma urealyticum, Chlamydia trachomatis, Mycoplasma genitalium and Neisseria gonorrhoeae infections among obstetrics and gynecological outpatients in southwest China: a retrospective study  | BMC Infectious Diseases                          | 10.1186/s12879-021-06966-z   | Population (did not report data from PrEP users) |
| Ljubin-Sternak, 2014 | Mycoplasma genitalium – Sexually transmitted pathogen that cannot be ignored                                                                                                                                    | Infektoloski Glasnik                             | NR                           | Population (did not report data from PrEP users) |
| Ljubin-Sternak, 2017 | Assessing the need for routine screening for mycoplasma genitalium in the low-risk female population: A prevalence and co-infection study on women from Croatia                                                 | International Journal of Preventive Medicine     | 10.4103/ijpvm.IJPVM_309_16   | Population (did not report data from PrEP users) |
| Llangari-Arizo, 2021 | Sexually transmitted infections and factors associated with risky sexual practices among female sex workers: A cross sectional study in a large Andean city                                                     | PLoS ONE                                         | 10.1371/journal.pone.0250117 | Population (did not report data from PrEP users) |
| Lockhart, 2018       | Prospective Evaluation of Cervicovaginal Self- and Cervical Physician Collection for the Detection of Chlamydia trachomatis, Neisseria gonorrhoeae, Trichomonas vaginalis, and Mycoplasma genitalium Infections | Sexually Transmitted Diseases                    | 10.1097/OLQ.0000000000000778 | Population (did not report data from PrEP users) |
| Lockhart, 2019       | Prevalence and risk factors of trichomonas vaginalis among female sexual workers in Nairobi, Kenya                                                                                                              | Sexually Transmitted Diseases                    | 10.1097/OLQ.0000000000001002 | Population (did not report data from PrEP users) |
| Lokken, 2017         | Association of Recent Bacterial Vaginosis With Acquisition of Mycoplasma genitalium                                                                                                                             | Am J Epidemiol                                   | 10.1093/aje/kwx043           | Population (did not report data from PrEP users) |
| Lopez-Arias, 2019    | Genital association of human papillomavirus with Mycoplasma and Ureaplasma spp. in Mexican women with precancerous lesions                                                                                      | International Journal of STD and AIDS            | 10.1177/0956462419855508     | Population (did not report data from PrEP users) |
| López-Corbeto, 2020  | Pooling of urine samples for molecular detection of Chlamydia trachomatis, Neisseria gonorrhoeae and Mycoplasma genitalium as a screening strategy among young adults in Catalonia                              | Enfermedades Infecciosas y Microbiología Clínica | 10.1016/j.eimc.2019.05.003   | Population (did not report data from PrEP users) |
| Lovett, 2022         | Cervicovaginal Microbiota Predicts Neisseria gonorrhoeae Clinical Presentation                                                                                                                                  | Frontiers in Microbiology                        | 10.3389/fmicb.2021.790531    | Population (did not report data from PrEP users) |

|                        |                                                                                                                                                                                          |                                               |                                 |                                                  |
|------------------------|------------------------------------------------------------------------------------------------------------------------------------------------------------------------------------------|-----------------------------------------------|---------------------------------|--------------------------------------------------|
| Lusk, 2011             | Mycoplasma genitalium is associated with cervicitis and HIV infection in an urban Australian STI clinic population                                                                       | Sexually Transmitted Infections               | 10.1136/sti.2010.045138         | Population (did not report data from PrEP users) |
| Lusk, 2016             | Cervicitis aetiology and case definition: A study in Australian women attending sexually transmitted infection clinics                                                                   | Sexually Transmitted Infections               | 10.1136/sextrans-2015-052332    | Population (did not report data from PrEP users) |
| Lusk, 2017             | Cervicitis: a prospective observational study of empiric azithromycin treatment in women with cervicitis and non-specific cervicitis                                                     | International Journal of STD and AIDS         | 10.1177/0956462416628319        | Population (did not report data from PrEP users) |
| Macones, 2012          | Discussion: 'Mycoplasma genitalium in cervicitis and pelvic inflammatory disease' by Bjartling et al                                                                                     | American Journal of Obstetrics and Gynecology | 10.1016/j.ajog.2012.04.020      | Population (did not report data from PrEP users) |
| Macones, 2012          | Mycoplasma genitalium in cervicitis and pelvic inflammatory disease: Bjartling et al                                                                                                     | American Journal of Obstetrics and Gynecology | 10.1016/j.ajog.2012.04.013      | Population (did not report data from PrEP users) |
| Magaña-Contreras, 2015 | Prevalence of sexually transmitted pathogens associated with HPV infection in cervical samples in a Mexican population                                                                   | Journal of Medical Virology                   | 10.1002/jmv.24278               | Population (did not report data from PrEP users) |
| Magdaleno, 2020        | Prevalencia de la infección por Mycoplasma genitalium en mujeres embarazadas                                                                                                             | Acta bioquím. clín. latinoam                  | NR                              | Population (did not report data from PrEP users) |
| Mahlangu, 2019         | The Prevalence of Mycoplasma genitalium and Association With Human Immunodeficiency Virus Infection in Symptomatic Patients, Johannesburg, South Africa, 2007-2014                       | Sexually Transmitted Diseases                 | 10.1097/olq.0000000000000984    | Population (did not report data from PrEP users) |
| Mahlangu, 2022         | Molecular Characterization and Detection of Macrolide and Fluoroquinolone Resistance Determinants in Mycoplasma genitalium in South Africa, 2015 to 2018                                 | Sexually Transmitted Diseases                 | 10.1097/olq.0000000000001631    | Population (did not report data from PrEP users) |
| Maina, 2021            | Diagnostic accuracy of the syndromic management of four stis among individuals seeking treatment at a health centre in nairobi, kenya: A cross-sectional study                           | Pan African Medical Journal                   | 10.11604/pamj.2021.40.138.25166 | Population (did not report data from PrEP users) |
| Malaguti, 2015         | Sensitive detection of thirteen bacterial vaginosis-associated agents using multiplex polymerase chain reaction                                                                          | BioMed Research International                 | 10.1155/2015/645853             | Population (did not report data from PrEP users) |
| Manhart, 2013          | Bacterial vaginosis-associated bacteria in men: Association of Leptotrichia/Sneathia spp. with nongonococcal urethritis                                                                  | Sexually Transmitted Diseases                 | 10.1097/OLQ.0000000000000054    | Population (did not report data from PrEP users) |
| Manhart, 2013          | Mycoplasma Genitalium infection in sub-Saharan Africa: how big is the problem?                                                                                                           | Sex Transm Dis                                | 10.1097/OLQ.0b013e3182924b3b    | Population (did not report data from PrEP users) |
| Manhart, 2017          | Mycoplasma genitalium on the Loose: Time to Sound the Alarm                                                                                                                              | Sex Transm Dis                                | 10.1097/olq.0000000000000665    | Population (did not report data from PrEP users) |
| Manhart, 2020          | Characteristics of mycoplasma genitalium urogenital infections in a diverse patient sample from the United States: Results from the aptima mycoplasma genitalium evaluation study (AMES) | Journal of Clinical Microbiology              | 10.1128/JCM.00165-20            | Population (did not report data from PrEP users) |
| Mansson, 2010          | High prevalence of HIV-1, HIV-2 and other sexually transmitted infections among women attending two sexual health clinics in Bissau, Guinea-Bissau, West Africa                          | International Journal of STD and AIDS         | 10.1258/ijsa.2010.009584        | Population (did not report data from PrEP users) |

|                   |                                                                                                                                                                                 |                                                 |                              |                                                  |
|-------------------|---------------------------------------------------------------------------------------------------------------------------------------------------------------------------------|-------------------------------------------------|------------------------------|--------------------------------------------------|
| Marlowe, 2019     | Trichomonas vaginalis detection in female specimens with cobas® TV/MG for use on the cobas® 6800/8800 systems                                                                   | European Journal of Microbiology and Immunology | 10.1556/1886.2019.00004      | Population (did not report data from PrEP users) |
| Martin-Saco, 2022 | Mycoplasma genitalium and sexually transmitted infections: evidences and figures in a tertiary hospital                                                                         | Revista Espanola de Quimioterapia               | 10.37201/req/091.2021        | Population (did not report data from PrEP users) |
| Marvast, 2017     | Relationship between Chlamydia trachomatis and Mycoplasma genitalium infection and pregnancy rate and outcome in Iranian infertile couples                                      | Andrologia                                      | 10.1111/and.12747            | Population (did not report data from PrEP users) |
| Mavedzenge, 2012  | The association between Mycoplasma genitalium and HIV-1 acquisition in African women                                                                                            | AIDS                                            | 10.1097/QAD.0b013e32834ff690 | Population (did not report data from PrEP users) |
| Mawu, 2011        | Sexually transmissible infections among female sex workers in Manado, Indonesia, using a multiplex polymerase chain reaction-based reverse line blot assay                      | Sexual Health                                   | 10.1071/SH10023              | Population (did not report data from PrEP users) |
| Mbah, 2022        | Association between Chlamydia trachomatis, Neisseria gonorrhoea, Mycoplasma genitalium, and Trichomonas vaginalis and Secondary Infertility in Cameroon: A case-control study   | PLoS ONE                                        | 10.1371/journal.pone.0263186 | Population (did not report data from PrEP users) |
| McAuliffe, 2019   | Barriers to testing and management of Mycoplasma genitalium infections in primary care                                                                                          | International Journal of STD and AIDS           | 10.1177/0956462419859757     | Population (did not report data from PrEP users) |
| McClellan, 2017   | Analytical Validation of an Analyte Specific Reagent (ASR) for Mycoplasma genitalium Detection and Point Prevalence Assessment                                                  | Journal of Molecular Diagnostics                | NR                           | Population (did not report data from PrEP users) |
| McKechnie, 2011   | The prevalence of urogenital micro-organisms detected by a multiplex PCR-reverse line blot assay in women attending three sexual health clinics in Sydney, Australia            | Journal of Medical Microbiology                 | 10.1099/jmm.0.029108-0       | Population (did not report data from PrEP users) |
| Mehta, 2012       | The effect of medical male circumcision on urogenital mycoplasma genitalium among men in Kisumu, Kenya                                                                          | Sexually Transmitted Diseases                   | 10.1097/OLQ.0b013e318240189c | Population (did not report data from PrEP users) |
| Melendez, 2022    | Retrospective Analysis of Ugandan Men with Urethritis Reveals Mycoplasma genitalium and Associated Macrolide Resistance                                                         | Microbiol Spectrum                              | 10.1128/spectrum.02304-21    | Population (did not report data from PrEP users) |
| Menezes, 2022     | Prevalence and Factors Associated with Mycoplasma genitalium Infection in At-risk Adolescent Females                                                                            | Journal of Pediatric and Adolescent Gynecology  | 10.1016/j.jpjg.2022.01.036   | Population (did not report data from PrEP users) |
| Mezzini, 2013     | Mycoplasma genitalium: Prevalence in men presenting with urethritis to a South Australian public sexual health clinic                                                           | Internal Medicine Journal                       | 10.1111/imj.12103            | Population (did not report data from PrEP users) |
| Mezzini, 2013     | Mycoplasma genitalium: prevalence in men presenting with urethritis to a South Australian public sexual health clinic (vol 43, pg 494, 2013)                                    | Internal Medicine Journal                       | NR                           | Population (did not report data from PrEP users) |
| Mhlongo, 2010     | Etiology and STI/HIV coinfections among patients with urethral and vaginal discharge syndromes in South Africa                                                                  | Sexually Transmitted Diseases                   | 10.1097/OLQ.0b013e3181d877b7 | Population (did not report data from PrEP users) |
| Mirnejad, 2011    | Simultaneous and rapid differential diagnosis of Mycoplasma genitalium and Ureaplasma urealyticum based on a polymerase chain reaction-restriction fragment length polymorphism | Indian Journal of Medical Microbiology          | 10.4103/0255-0857.76521      | Population (did not report data from PrEP users) |

|                    |                                                                                                                                                                                                                                                |                                          |                                   |                                                  |
|--------------------|------------------------------------------------------------------------------------------------------------------------------------------------------------------------------------------------------------------------------------------------|------------------------------------------|-----------------------------------|--------------------------------------------------|
| Mlisana, 2012      | Symptomatic vaginal discharge is a poor predictor of sexually transmitted infections and genital tract inflammation in high-risk women in South Africa                                                                                         | Journal of Infectious Diseases           | 10.1093/infdis/jis298             | Population (did not report data from PrEP users) |
| Mo, 2016           | Prevalence and correlates of Mycoplasma genitalium infection among prostatitis patients in Shanghai, China                                                                                                                                     | Sexual Health                            | 10.1071/SH15155                   | Population (did not report data from PrEP users) |
| Mobley, 2012       | Mycoplasma genitalium infection in women attending a sexually transmitted infection clinic: Diagnostic specimen type, coinfections, and predictors                                                                                             | Sexually Transmitted Diseases            | 10.1097/OLQ.0b013e318255de03      | Population (did not report data from PrEP users) |
| Moghadam, 2014     | Isolation and molecular identification of mycoplasma genitalium from the secretion of genital tract in infertile male and female                                                                                                               | Iranian Journal of Reproductive Medicine | NR                                | Population (did not report data from PrEP users) |
| Moi, 2017          | Urethral inflammatory response to ureaplasma is significantly lower than to Mycoplasma genitalium and Chlamydia trachomatis                                                                                                                    | International Journal of STD and AIDS    | 10.1177/0956462416666482          | Population (did not report data from PrEP users) |
| Molin, 2016        | Is the risk for sexually transmissible infections (STI) lower among women with exclusively female sexual partners compared with women with male partners? A retrospective study based on attendees at a Norwegian STI clinic from 2004 to 2014 | Sexual Health                            | 10.1071/SH15193                   | Population (did not report data from PrEP users) |
| Molina, 2021       | Incidence of HIV infection with daily or on-demand oral prep with TDF/FTC in France                                                                                                                                                            | Topics in Antiviral Medicine             | NR                                | Population (did not report data from PrEP users) |
| Molina, 2022       | Daily and on-demand HIV pre-exposure prophylaxis with emtricitabine and tenofovir disoproxil (ANRS PREVENIR): a prospective observational cohort study                                                                                         | The Lancet HIV                           | 10.1016/S2352-3018(22)00133-3     | Outcome                                          |
| Mondeja, 2018      | Mycoplasma genitalium infections in Cuba: surveillance of urogenital syndromes, 2014–2015                                                                                                                                                      | International Journal of STD and AIDS    | 10.1177/0956462418767186          | Population (did not report data from PrEP users) |
| Moore, 2021        | Mycoplasma genitalium and Bacterial Vaginosis-Associated Bacteria in a Non-Clinic-Based Sample of African American Women                                                                                                                       | Sexually transmitted diseases            | 10.1097/OLQ.0000000000001275      | Population (did not report data from PrEP users) |
| Moran, 2022        | Evaluating specimen pooling for Neisseria gonorrhoeae, Chlamydia trachomatis, and Mycoplasma genitalium screening in asymptomatic men who have sex with men                                                                                    | Int J STD AIDS                           | 10.1177/09564624221100098         | Population (did not report data from PrEP users) |
| Moridi, 2021       | Prevalence determination of m. hominis and m. genitalium in the semen samples in the northeast of Iran using culture and multiplex polymerase chain reaction                                                                                   | Archives of Razi Institute               | 10.22092/ari.2019.125966.1338     | Population (did not report data from PrEP users) |
| Mortaki, 2020      | Prevalence of cervico-vaginal high-risk HPV types and other sexually transmitted pathogens in anogenital warts patients                                                                                                                        | Anticancer Research                      | 10.21873/anticanres.14183         | Full text not found                              |
| Mortamedifar, 2020 | The prevalence of bacteriospermia in infertile men and association with semen quality in southwestern Iran                                                                                                                                     | Infectious Disorders - Drug Targets      | 10.2174/1871526519666181123182116 | Full text not found                              |
| Mounzer, 2021      | Are We Hitting the Target? HIV Pre-Exposure Prophylaxis from 2012 to 2020 in the OPERA Cohort                                                                                                                                                  | AIDS Patient Care and STDs               | 10.1089/apc.2021.0064             | Outcome                                          |
| Mousavi, 2014      | Detection of genital mycoplasmal infections among infertile females by multiplex PCR                                                                                                                                                           | Iranian Journal of Microbiology          | NR                                | Population (did not report data from PrEP users) |



|                   |                                                                                                                                                                                                                 |                                                     |                               |                                                            |
|-------------------|-----------------------------------------------------------------------------------------------------------------------------------------------------------------------------------------------------------------|-----------------------------------------------------|-------------------------------|------------------------------------------------------------|
| Mueller, 2020     | Sexually transmitted coinfections in patients with anogenital warts – a retrospective analysis of 196 patients                                                                                                  | JDDG - Journal of the German Society of Dermatology | 10.1111/ddg.14060             | Population (did not report data from PrEP users)           |
| Müller, 2012      | Development of a rotor-gene real-time PCR assay for the detection and quantification of <i>Mycoplasma genitalium</i>                                                                                            | Journal of Microbiological Methods                  | 10.1016/j.mimet.2011.12.017   | Population (did not report data from PrEP users)           |
| Muller, 2019      | Macrolide and fluoroquinolone resistance-associated mutations in <i>Mycoplasma genitalium</i> in Johannesburg, South Africa, 2007-2014                                                                          | BMC Infectious Diseases                             | 10.1186/s12879-019-3797-6     | Population (did not report data from PrEP users)           |
| Mulligan, 2019    | Prevalence, Macrolide Resistance, and Fluoroquinolone Resistance in <i>Mycoplasma genitalium</i> in Men Who Have Sex with Men Attending an Sexually Transmitted Disease Clinic in Dublin, Ireland in 2017-2018  | Sexually Transmitted Diseases                       | 10.1097/OLQ.0000000000000940  | Population (did not report data from PrEP users)           |
| Muñoz Santa, 2021 | <i>Mycoplasma genitalium</i> : Analysis of mutations associated with macrolide resistance in Lleida, Spain                                                                                                      | Enfermedades Infecciosas y Microbiología Clínica    | 10.1016/j.eimc.2021.02.004    | Population (did not report data from PrEP users)           |
| Muñoz Santa, 2022 | <i>Mycoplasma genitalium</i> : Analysis of mutations associated with macrolide resistance in Lleida, Spain                                                                                                      | Enferm Infecc Microbiol Clin (Engl Ed)              | 10.1016/j.eimce.2021.02.010   | Population (did not report the number of patients on PrEP) |
| Munson, 2016      | Clinical Laboratory Assessment of <i>Mycoplasma genitalium</i> Transcription-Mediated Amplification Using Primary Female Urogenital Specimens                                                                   | Journal of Clinical Microbiology                    | 10.1128/jcm.02463-15          | Population (did not report data from PrEP users)           |
| Munson, 2017      | Clinical laboratory assessments for <i>Mycoplasma genitalium</i> in a high-prevalence sexually-transmitted infection community reveal epidemiologic dichotomies with <i>Trichomonas vaginalis</i>               | Expert Review of Anti-Infective Therapy             | 10.1080/14787210.2017.1265887 | Population (did not report data from PrEP users)           |
| Munson, 2017      | Expansion of comprehensive screening of male sexually transmitted infection clinic attendees with <i>Mycoplasma genitalium</i> and <i>Trichomonas vaginalis</i> molecular assessment: A retrospective analysis  | Journal of Clinical Microbiology                    | 10.1128/JCM.01625-16          | Population (did not report data from PrEP users)           |
| Munson, 2017      | Molecular Diagnostics Update for the Emerging (If Not Already Widespread) Sexually Transmitted Infection Agent <i>Mycoplasma genitalium</i> : Just About Ready for Prime Time                                   | J Clin Microbiol                                    | 10.1128/jcm.00818-17          | Population (did not report data from PrEP users)           |
| Munson, 2020      | Comprehensive Molecular Screening in a Cohort of Young Men Who Have Sex With Men and Transgender Women: Effect of Additive Rectal Specimen Source Collection and Analyte Testing                                | Sex Transm Dis                                      | 10.1097/olq.0000000000001244  | Population (did not report data from PrEP users)           |
| Munson, 2021      | Molecular screening in a longitudinal cohort of young men who have sex with men and young transgender women: Associations with focus on the emerging sexually transmitted pathogen <i>Mycoplasma genitalium</i> | Sexually Transmitted Infections                     | 10.1136/sextrans-2020-054463  | Population (did not report data from PrEP users)           |
| Murray, 2019      | The impact of sample storage on molecular-based detection of <i>Mycoplasma genitalium</i>                                                                                                                       | Journal of Applied Microbiology                     | 10.1111/jam.14359             | Population (did not report data from PrEP users)           |
| Murray, 2022      | parC Variants in <i>Mycoplasma genitalium</i> : Trends over Time and Association with Moxifloxacin Failure                                                                                                      | Antimicrob Agents Chemother                         | 10.1128/aac.00278-22          | Population (did not report data from PrEP users)           |
| Muzny, 2011       | Sexually transmitted infections and risk behaviors among African American women who have sex with women: Does sex with men make a difference?                                                                   | Sexually Transmitted Diseases                       | 10.1097/OLQ.0b013e31822e6179  | Population (did not report data from PrEP users)           |

|                      |                                                                                                                                                                                                                                                                                                        |                                                                                    |                                    |                                                  |
|----------------------|--------------------------------------------------------------------------------------------------------------------------------------------------------------------------------------------------------------------------------------------------------------------------------------------------------|------------------------------------------------------------------------------------|------------------------------------|--------------------------------------------------|
| Muzny, 2014          | Sexual partnership characteristics of African American women who have sex with women; impact on sexually transmitted infection risk                                                                                                                                                                    | Sex Transm Dis                                                                     | 10.1097/olq.0000000000000194       | Population (did not report data from PrEP users) |
| Mwasakifwa, 2020     | Proctitis in gay and bisexual men. Are microscopy and proctoscopy worthwhile?                                                                                                                                                                                                                          | Sexually Transmitted Infections                                                    | 10.1136/sextrans-2019-054197       | Outcome                                          |
| NA, 2015             | STI and HIV World Congress 2015                                                                                                                                                                                                                                                                        | Sexually Transmitted Infections                                                    | NR                                 | Population (did not report data from PrEP users) |
| NA, 2020             | BASHH Virtual Annual Conference                                                                                                                                                                                                                                                                        | International Journal of STD and AIDS                                              | NR                                 | Population (did not report data from PrEP users) |
| Nakashima, 2014      | Prevalence of human papillomavirus infection in the oropharynx and urine among sexually active men: A comparative study of infection by papillomavirus and other organisms, including <i>Neisseria gonorrhoeae</i> , <i>Chlamydia trachomatis</i> , <i>Mycoplasma spp.</i> , and <i>Ureaplasma spp</i> | BMC Infectious Diseases                                                            | 10.1186/1471-2334-14-43            | Population (did not report data from PrEP users) |
| Napierala, 2015      | Detection of <i>Mycoplasma genitalium</i> from male primary urine specimens: An epidemiologic dichotomy with <i>Trichomonas vaginalis</i>                                                                                                                                                              | Diagnostic Microbiology and Infectious Disease                                     | 10.1016/j.diagmicrobio.2015.03.016 | Population (did not report data from PrEP users) |
| Napierala, 2015      | <i>Mycoplasma genitalium</i> is associated with increased genital HIV type 1 RNA in zimbabwean women                                                                                                                                                                                                   | Journal of Infectious Diseases                                                     | 10.1093/infdis/jiu644              | Population (did not report data from PrEP users) |
| Nemirosky, 2021      | Macrolide resistance in <i>Mycoplasma genitalium</i> in Catalonia, Spain: a 1 year prospective study                                                                                                                                                                                                   | Journal of Antimicrobial Chemotherapy                                              | 10.1093/jac/dkab224                | Population (did not report data from PrEP users) |
| Ng, 2016             | <i>Trichomonas vaginalis</i> infection: How significant is it in men presenting with recurrent or persistent symptoms of urethritis?                                                                                                                                                                   | International Journal of STD and AIDS                                              | 10.1177/0956462415571372           | Population (did not report data from PrEP users) |
| Ng, 2020             | Molecular detection of <i>mycoplasma genitalium</i> in endocervical swabs and associated rates of macrolide and fluoroquinolone resistance in hong kong                                                                                                                                                | Hong Kong Medical Journal                                                          | 10.12809/hkmj208507                | Population (did not report data from PrEP users) |
| Nguyen, 2022         | Investigating the microbial pathogens of sexually transmitted infections among heterosexual Vietnamese men with symptomatic urethritis                                                                                                                                                                 | Aging Male                                                                         | 10.1080/13685538.2022.2063272      | Population (did not report data from PrEP users) |
| Nijhuis, 2021        | Prevalence of <i>Chlamydia trachomatis</i> , <i>Neisseria gonorrhoeae</i> , <i>Mycoplasma genitalium</i> and <i>Trichomonas vaginalis</i> including relevant resistance-associated mutations in a single center in the Netherlands                                                                     | European Journal of Clinical Microbiology and Infectious Diseases                  | 10.1007/s10096-020-04061-w         | Population (did not report data from PrEP users) |
| Nilsen, 2011         | Low prevalence of <i>Mycoplasma genitalium</i> in patients examined for <i>Chlamydia trachomatis</i>                                                                                                                                                                                                   | Tidsskrift for den Norske lægeforening : tidsskrift for praktisk medicin, ny række | NR                                 | Population (did not report data from PrEP users) |
| Nodjikoumbaye , 2019 | Accuracy of curable sexually transmitted infections and genital mycoplasmas screening by multiplex real-time PCR using a self-collected veil among adult women in Sub-Saharan Africa                                                                                                                   | Infectious Diseases in Obstetrics and Gynecology                                   | 10.1155/2019/8639510               | Population (did not report data from PrEP users) |
| Nolskog, 2019        | STI with <i>Mycoplasma genitalium</i> —more common than <i>Chlamydia trachomatis</i> in patients attending youth clinics in Sweden                                                                                                                                                                     | European Journal of Clinical Microbiology and Infectious Diseases                  | 10.1007/s10096-018-3395-3          | Population (did not report data from PrEP users) |
| NR, 2010             | Sexually transmitted infections                                                                                                                                                                                                                                                                        | FMC Formacion Medica Continuada en Atencion Primaria                               | 10.1016/S1134-2072(10)70112-2      | Population (did not report data from PrEP users) |

|                  |                                                                                                                                                                                                                                         |                                                  |                              |                                                  |
|------------------|-----------------------------------------------------------------------------------------------------------------------------------------------------------------------------------------------------------------------------------------|--------------------------------------------------|------------------------------|--------------------------------------------------|
| Nye, 2020        | Prevalence of <i>Mycoplasma genitalium</i> infection in women with bacterial vaginosis                                                                                                                                                  | BMC Women's Health                               | 10.1186/s12905-020-00926-6   | Population (did not report data from PrEP users) |
| Oakeshott, 2010  | Is <i>Mycoplasma genitalium</i> in women the "new chlamydia?" A community-based prospective cohort study                                                                                                                                | Clinical Infectious Diseases                     | 10.1086/656739               | Population (did not report data from PrEP users) |
| Obermeier, 2019  | <i>Mycoplasma genitalium</i> resistance against macrolide antibiotics in the Berlin MSM cohort tested with the Alplex MG & AziR Assay (SeeGene)                                                                                         | Hiv Medicine                                     | NR                           | Population (did not report data from PrEP users) |
| Oh, 2021         | <i>Mycoplasma genitalium</i> and <i>Mycoplasma hominis</i> infection in south korea during 2018-2020                                                                                                                                    | Iranian Journal of Microbiology                  | 10.18502/ijm.v13i5.7423      | Population (did not report data from PrEP users) |
| Oh, 2022         | Laboratory Investigation of Sexually Transmitted Infections in the Elderly Population of South Korea                                                                                                                                    | Microbiology and Biotechnology Letters           | 10.48022/mbi.2204.04006      | Population (did not report data from PrEP users) |
| Oliphant, 2013   | Cervicitis: Limited clinical utility for the detection of <i>Mycoplasma genitalium</i> in a cross-sectional study of women attending a New Zealand sexual health clinic                                                                 | Sexual Health                                    | 10.1071/SH12168              | Population (did not report data from PrEP users) |
| Oliphant, 2016   | Pelvic inflammatory disease associated with <i>Chlamydia trachomatis</i> but not <i>Mycoplasma genitalium</i> in New Zealand                                                                                                            | Sexual Health                                    | 10.1071/SH14238              | Population (did not report data from PrEP users) |
| Olson, 2021      | <i>Mycoplasma genitalium</i> infection in women reporting dysuria: A pilot study and review of the literature                                                                                                                           | Int J STD AIDS                                   | 10.1177/09564624211030040    | Population (did not report data from PrEP users) |
| Ona, 2016        | <i>Mycoplasma genitalium</i> : An Overlooked Sexually Transmitted Pathogen in Women?                                                                                                                                                    | Infectious Diseases in Obstetrics and Gynecology | 10.1155/2016/4513089         | Population (did not report data from PrEP users) |
| Ondondo, 2010    | Differential association of ureaplasma species with non-gonococcal urethritis in heterosexual men                                                                                                                                       | Sexually Transmitted Infections                  | 10.1136/sti.2009.040394      | Population (did not report data from PrEP users) |
| Ong, 2017        | Should female partners of men with non-gonococcal urethritis, negative for <i>Chlamydia trachomatis</i> and <i>Mycoplasma genitalium</i> , be informed and treated? Clinical outcomes from a partner study of heterosexual men with NGU | Sexually Transmitted Diseases                    | 10.1097/OLQ.0000000000000546 | Population (did not report data from PrEP users) |
| Ong, 2018        | Clinical Characteristics of Anorectal <i>Mycoplasma genitalium</i> Infection and Microbial Cure in Men Who Have Sex with Men                                                                                                            | Sexually Transmitted Diseases                    | 10.1097/OLQ.0000000000000793 | Population (did not report data from PrEP users) |
| Ong, 2019        | Clinical Characteristics of <i>Mycoplasma genitalium</i> and the Usefulness of Syndromic Management Among Women Living With Human Immunodeficiency Virus                                                                                | Sex Transm Dis                                   | 10.1097/olq.0000000000001054 | Population (did not report data from PrEP users) |
| Ong, 2019        | Prevalence and Antimicrobial Resistance of <i>Mycoplasma genitalium</i> Infection among Women Living with Human Immunodeficiency Virus in South Africa: A Prospective Cohort Study                                                      | Clinical Infectious Diseases                     | 10.1093/cid/ciz045           | Population (did not report data from PrEP users) |
| Opolskiene, 2021 | The use of vaginal wet smear: can we predict <i>Mycoplasmas/Ureaplasmas</i> ?                                                                                                                                                           | Archives of Gynecology and Obstetrics            | 10.1007/s00404-021-05976-1   | Population (did not report data from PrEP users) |

|                         |                                                                                                                                                                                                                |                                                                                    |                              |                                                  |
|-------------------------|----------------------------------------------------------------------------------------------------------------------------------------------------------------------------------------------------------------|------------------------------------------------------------------------------------|------------------------------|--------------------------------------------------|
| Orzechowska, 2022       | Comparative Analysis of the Incidence of Selected Sexually Transmitted Bacterial Infections in Poland in 2010-2015: A Retrospective Cohort Study                                                               | Journal of Clinical Medicine                                                       | 10.3390/jcm11040998          | Population (did not report data from PrEP users) |
| Otgonjargala, 2017      | Effect of Mycoplasma hominis and cytomegalovirus infection on pregnancy outcome: A prospective study of 200 Mongolian women and their newborns                                                                 | PLoS ONE                                                                           | 10.1371/journal.pone.0173283 | Population (did not report data from PrEP users) |
| Ouzounova-Raykova, 2011 | Detection of the sexually transmissible genital mycoplasmas by polymerase chain reaction in women                                                                                                              | Sexual Health                                                                      | 10.1071/SH11044              | Population (did not report data from PrEP users) |
| Ouzounova-Raykova, 2018 | GENITAL MYCOPLASMAS AND UREAPLASMAS AND ABNORMAL SEMEN QUALITY IN INFERTILE BULGARIAN MEN                                                                                                                      | Comptes Rendus De L Academie Bulgare Des Sciences                                  | 10.7546/crabs.2018.07.15     | Full text not found                              |
| Pai, 2013               | Prevalence of sexually transmitted diseases among men who have sex with men in some cities of Jiangsu province                                                                                                 | Chinese Journal of Dermatology                                                     | NR                           | Full text not found                              |
| Panos, 2018             | Prevalence studies of M. genitalium and other sexually transmitted pathogens in high risk individuals indicate the need for comprehensive investigation of STIs for accurate diagnosis and effective treatment | GERMS                                                                              | 10.18683/germs.2018.1127     | Population (did not report data from PrEP users) |
| Papeš, 2017             | Detection of sexually transmitted pathogens in patients with chronic prostatitis/chronic pelvic pain: a prospective clinical study                                                                             | International Journal of STD and AIDS                                              | 10.1177/0956462417691440     | Population (did not report data from PrEP users) |
| Park, 2017              | Prevalence of and Risk Factors for Sexually Transmitted Infections among Korean Adolescents under Probation                                                                                                    | Journal of Korean medical science                                                  | 10.3346/jkms.2017.32.11.1771 | Population (did not report data from PrEP users) |
| Park, 2020              | Prevalence and correlated factors of sexually transmitted infections among women attending a Korean sexual assault center                                                                                      | Journal of Forensic and Legal Medicine                                             | 10.1016/j.jflm.2020.101935   | Population (did not report data from PrEP users) |
| Parmar, 2021            | High Prevalence of Macrolide and Fluoroquinolone Resistance-Mediating Mutations in Mycoplasma genitalium -Positive Urine Specimens from Saskatchewan                                                           | Sexually Transmitted Diseases                                                      | 10.1097/OLQ.0000000000001402 | Population (did not report data from PrEP users) |
| Paulsen, 2016           | Prevalence of M. genitalium and U. urealyticum in urine tested for C. trachomatis                                                                                                                              | Tidsskrift for den Norske lægeforening : tidsskrift for praktisk medicin, ny række | 10.4045/tidsskr.14.1574      | Population (did not report data from PrEP users) |
| Payne, 2016             | Ureaplasma parvum genotype, combined vaginal colonisation with Candida albicans, and spontaneous preterm birth in an Australian cohort of pregnant women                                                       | BMC Pregnancy and Childbirth                                                       | 10.1186/s12884-016-1110-x    | Population (did not report data from PrEP users) |
| Peacock, 2022           | Successful Identification of Mixed Vaginal Infections Requires Comprehensive Testing                                                                                                                           | Obstetrics and Gynecology                                                          | NR                           | Population (did not report data from PrEP users) |
| Pebdeni, 2022           | Bacteriospermia and its association with seminal fluid parameters and infertility in infertile men, Kerman, Iran: A cross-sectional study                                                                      | International Journal of Reproductive BioMedicine                                  | 10.18502/ijrm.v20i3.10712    | Population (did not report data from PrEP users) |
| Pecavar, 2021           | Pre-exposure prophylaxis for HIV with oral tenofovir disoproxil fumarate/emtricitabine in men who have sex with men: Slovenian national demonstration project                                                  | International Journal of STD and AIDS                                              | 10.1177/09564624211019876    | Outcome                                          |
| Peretz, 2020            | Mycoplasma and Ureaplasma carriage in pregnant women: The prevalence of transmission from mother to newborn                                                                                                    | BMC Pregnancy and Childbirth                                                       | 10.1186/s12884-020-03147-9   | Population (did not report data from PrEP users) |

|                 |                                                                                                                                                                           |                                                         |                                    |                                                  |
|-----------------|---------------------------------------------------------------------------------------------------------------------------------------------------------------------------|---------------------------------------------------------|------------------------------------|--------------------------------------------------|
| Pereyre, 2017   | Mycoplasma genitalium and Trichomonas vaginalis in France: a point prevalence study in people screened for sexually transmitted diseases                                  | Clinical Microbiology and Infection                     | 10.1016/j.cmi.2016.10.028          | Population (did not report data from PrEP users) |
| Pereyre, 2022   | Prevalence of macrolide and fluoroquinolone resistance-associated mutations in Mycoplasma genitalium in metropolitan and overseas France                                  | Sexually Transmitted Infections                         | 10.1136/sextrans-2022-055466       | Population (did not report data from PrEP users) |
| Perin, 2021     | Maternal and Fetal Outcomes in an Observational Cohort of Women With Mycoplasma genitalium Infections                                                                     | Sexually transmitted diseases                           | 10.1097/OLQ.0000000000001569       | Population (did not report data from PrEP users) |
| Peters, 2021    | Lack of macrolide resistance in Mycoplasma genitalium infections in a cohort of pregnant women in South Africa                                                            | Sexually Transmitted Infections                         | 10.1136/sextrans-2020-054583       | Population (did not report data from PrEP users) |
| Petrov, 2021    | Distribution of Mycoplasma spp. and Ureaplasma spp. among pregnant women                                                                                                  | Journal of IMAB - Annual Proceeding (Scientific Papers) | 10.5272/JIMAB.2021271.3630         | Population (did not report data from PrEP users) |
| Peuchant, 2012  | Prevalence and risk factors associated with Chlamydia trachomatis, Neisseria gonorrhoeae and Mycoplasma genitalium infections in French pregnant women                    | Clinical Microbiology and Infection                     | 10.1111/j.1469-0691.2012.03802.x   | Population (did not report data from PrEP users) |
| Peuchant, 2015  | Screening for Chlamydia trachomatis, Neisseria gonorrhoeae, and Mycoplasma genitalium should it be integrated into routine pregnancy care in French young pregnant women? | Diagnostic Microbiology and Infectious Disease          | 10.1016/j.diagmicrobio.2015.01.014 | Population (did not report data from PrEP users) |
| Philipova, 2017 | Mycoplasma genitalium: Prevalence and clinical significance in Sofia municipality                                                                                         | Problems of Infectious and Parasitic Diseases           | NR                                 | Population (did not report data from PrEP users) |
| Philipova, 2022 | Azithromycin treatment failure and macrolide resistance in Mycoplasma genitalium infections in Sofia, Bulgaria                                                            | Folia Med (Plovdiv)                                     | 10.3897/folmed.64.e63624           | Population (did not report data from PrEP users) |
| Pietro, 2020    | The swiss STAR trial - An evaluation of target groups for sexually transmitted infection screening in the sub-sample of women                                             | Swiss Medical Weekly                                    | 10.4414/smw.2020.20393             | Population (did not report data from PrEP users) |
| Pintye, 2014    | Association between male circumcision and incidence of syphilis in men and women: a prospective study in HIV-1 serodiscordant heterosexual African couples                | Lancet Global Health                                    | 10.1016/s2214-109x(14)70315-8      | Population (did not report data from PrEP users) |
| Piscopo, 2020   | Increased prevalence of endocervical Mycoplasma and Ureaplasma colonization in infertile women with tubal factor                                                          | Jornal Brasileiro De Reproducao Assistida               | 10.5935/1518-0557.20190078         | Population (did not report data from PrEP users) |
| Pitt, 2021      | Prevalence of Chlamydia trachomatis and Mycoplasma genitalium coinfections and M. genitalium antimicrobial resistance in rectal specimens                                 | Sexually Transmitted Infections                         | 10.1136/sextrans-2020-054803       | Population (did not report data from PrEP users) |
| Pitt, 2022      | Antimicrobial resistance in bacterial sexually transmitted infections                                                                                                     | Medicine (United Kingdom)                               | 10.1016/j.mpmed.2022.02.006        | Population (did not report data from PrEP users) |
| Plecko, 2014    | Unusually low prevalence of Mycoplasma genitalium in urine samples from infertile men and healthy controls: A prevalence study                                            | BMJ Open                                                | 10.1136/bmjopen-2014-005372        | Population (did not report data from PrEP users) |
| Plummer, 2021   | Are Mycoplasma hominis, Ureaplasma urealyticum and Ureaplasma parvum Associated with Specific Genital Symptoms and Clinical Signs in Nonpregnant Women?                   | Clinical Infectious Diseases                            | 10.1093/cid/ciab061                | Population (did not report data from PrEP users) |

|                    |                                                                                                                                                                                                                         |                                                                   |                               |                                                  |
|--------------------|-------------------------------------------------------------------------------------------------------------------------------------------------------------------------------------------------------------------------|-------------------------------------------------------------------|-------------------------------|--------------------------------------------------|
| Pond, 2014         | High prevalence of antibiotic-resistant mycoplasma genitalium in nongonococcal urethritis: The need for routine testing and the inadequacy of current treatment options                                                 | Clinical Infectious Diseases                                      | 10.1093/cid/cit752            | Population (did not report data from PrEP users) |
| Qing, 2017         | Prevalence of Chlamydia trachomatis, Neisseria gonorrhoeae, Mycoplasma genitalium and Ureaplasma urealyticum infections using a novel isothermal simultaneous RNA amplification testing method in infertile males       | Annals of Clinical Microbiology and Antimicrobials                | 10.1186/s12941-017-0220-2     | Population (did not report data from PrEP users) |
| Quentin, 2012      | Microbiologic basis of diagnosis and treatment of pelvic inflammatory disease                                                                                                                                           | Journal De Gynecologie Obstetrique Et Biologie De La Reproduction | 10.1016/j.jgyn.2012.09.015    | Population (did not report data from PrEP users) |
| Raffe, 2022        | Diagnostic tests for sexually transmitted infections                                                                                                                                                                    | Medicine (United Kingdom)                                         | 10.1016/j.mpmed.2022.01.004   | Population (did not report data from PrEP users) |
| Rahimkhani, 2018   | Detection of urinary Chlamydia trachomatis, Mycoplasma genitalium and human papilloma virus in the first trimester of pregnancy by PCR method                                                                           | Annals of Clinical Microbiology and Antimicrobials                | 10.1186/s12941-018-0276-7     | Population (did not report data from PrEP users) |
| Ramazanzadeh, 2016 | A Case-control Study on the Relationship between Mycoplasma genitalium Infection in Women with Normal Pregnancy and Spontaneous Abortion using Polymerase Chain Reaction                                                | Osong Public Health and Research Perspectives                     | 10.1016/j.phrp.2016.07.001    | Population (did not report data from PrEP users) |
| Ramien, 2016       | Prevalence and Therapy Refractoriness of Mycoplasma-genitalium-infections in HIV-positive and HIV-negative Patients                                                                                                     | Journal Der Deutschen Dermatologischen Gesellschaft               | NR                            | Population (did not report data from PrEP users) |
| Randjelovic, 2018  | The Role of Polymorphonuclear Leukocyte Counts from Urethra, Cervix, and Vaginal Wet Mount in Diagnosis of Nongonococcal Lower Genital Tract Infection                                                                  | Infectious Diseases in Obstetrics and Gynecology                  | 10.1155/2018/8236575          | Population (did not report data from PrEP users) |
| Rane, 2014         | Characteristics of acute nongonococcal urethritis in men differ by sexual preference                                                                                                                                    | J Clin Microbiol                                                  | 10.1128/jcm.00899-14          | Population (did not report data from PrEP users) |
| Rawre, 2019        | Distribution of Chlamydia trachomatis omp A genotypes in patients attending a sexually transmitted disease outpatient clinic in New Delhi, India                                                                        | Indian Journal of Medical Research                                | 10.4103/ijmr.IJMR_1171_17     | Population (did not report data from PrEP users) |
| Redelinghuys, 2015 | A cross-sectional study on the relationship of age, gestational age and HIV infection to bacterial vaginosis and genital mycoplasma infection                                                                           | BMJ Open                                                          | 10.1136/bmjopen-2015-008530   | Population (did not report data from PrEP users) |
| Refaat, 2016       | The prevalence of Chlamydia trachomatis and Mycoplasma genitalium tubal infections and their effects on the expression of IL-6 and leukaemia inhibitory factor in Fallopian tubes with and without an ectopic pregnancy | Innate Immunity                                                   | 10.1177/1753425916662326      | Population (did not report data from PrEP users) |
| Reichert, 2019     | High seroprevalence of mycoplasma genitalium in the general adult population of Germany                                                                                                                                 | Sexually Transmitted Infections                                   | 10.1136/sextrans-2019-sti.679 | Population (did not report data from PrEP users) |
| Reinton, 2013      | Anatomic distribution of Neisseria gonorrhoeae, Chlamydia trachomatis and Mycoplasma genitalium infections in men who have sex with men                                                                                 | Sexual Health                                                     | 10.1071/SH12092               | Population (did not report data from PrEP users) |
| Reinton, 2015      | Analysis of direct-to-consumer marketed Chlamydia trachomatis diagnostic tests in Norway                                                                                                                                | Sexual Health                                                     | 10.1071/SH14216               | Population (did not report data from PrEP users) |

|                   |                                                                                                                                                                                                                                      |                                               |                               |                                                  |
|-------------------|--------------------------------------------------------------------------------------------------------------------------------------------------------------------------------------------------------------------------------------|-----------------------------------------------|-------------------------------|--------------------------------------------------|
| Rekha, 2019       | Occurrence of <i>Mycoplasma genitalium</i> in the peritoneal fluid of fertile and infertile women with detailed analysis among infertile women                                                                                       | Microbial Pathogenesis                        | 10.1016/j.micpath.2019.02.006 | Population (did not report data from PrEP users) |
| Relich, 2018      | Clinical Evaluation of the Aptima <i>Mycoplasma genitalium</i> Assay Reveals the Prevalence of <i>Mycoplasma genitalium</i> Infection among Patients Tested for other Sexually Transmitted Pathogens in Indiana                      | Journal of Molecular Diagnostics              | NR                            | Population (did not report data from PrEP users) |
| Ribeiro, 2019     | Pre-exposure prophylaxis counseling in a community sexual health clinic for men who have sex with men in Lisbon, Portugal                                                                                                            | Acta Medica Portuguesa                        | 10.20344/amp.11474            | Population (did not report data from PrEP users) |
| Rietmeijer, 2018  | The Etiology of Male Urethral Discharge in Zimbabwe: Results from the Zimbabwe STI Etiology Study                                                                                                                                    | Sex Transm Dis                                | 10.1097/olq.0000000000000696  | Population (did not report data from PrEP users) |
| Ring, 2022        | High Rates of Asymptomatic <i>Mycoplasma genitalium</i> Infections With High Proportion of Genotypic Resistance to First-Line Macrolide Treatment Among Men Who Have Sex With Men Enrolled in the Zurich Primary HIV Infection Study | Open Forum Infectious Diseases                | 10.1093/ofid/ofac217          | Population (did not report data from PrEP users) |
| Rivaya, 2022      | Detection and Prevalence of Macrolide and Fluoroquinolone Resistance in <i>Mycoplasma genitalium</i> in Badalona, Spain                                                                                                              | Antibiotics (Basel)                           | 10.3390/antibiotics11040485   | Population (did not report data from PrEP users) |
| Rodrigues, 2011   | Frequency of <i>Chlamydia trachomatis</i> , <i>Neisseria gonorrhoeae</i> , <i>Mycoplasma genitalium</i> , <i>Mycoplasma hominis</i> and <i>Ureaplasma</i> species in cervical samples                                                | Journal of Obstetrics and Gynaecology         | 10.3109/01443615.2010.548880  | Population (did not report data from PrEP users) |
| Rodrigues, 2019   | Sexually transmitted infections among HIV-infected and HIV-uninfected women in the Tapajós region, Amazon, Brazil: Self-collected vs. Clinician-collected samples                                                                    | PLoS ONE                                      | 10.1371/journal.pone.0215001  | Population (did not report data from PrEP users) |
| Rodríguez, 2015   | Estudio retrospectivo en el diagnóstico de <i>Mycoplasma</i> y <i>Ureaplasma</i> en muestra seminal de 89 pacientes en la Ciudad de México                                                                                           | Rev. Fac. Med. UNAM                           | NR                            | Population (did not report data from PrEP users) |
| Ronda, 2018       | Does the Sex Risk Quiz Predict <i>Mycoplasma genitalium</i> Infection in Urban Adolescents and Young Adult Women?                                                                                                                    | Sexually Transmitted Diseases                 | 10.1097/OLQ.0000000000000874  | Population (did not report data from PrEP users) |
| Rowlands, 2017    | Microbial invasion of the amniotic cavity in midtrimester pregnancies using molecular microbiology                                                                                                                                   | American Journal of Obstetrics and Gynecology | 10.1016/j.ajog.2017.02.051    | Population (did not report data from PrEP users) |
| Rowlinson, 2021   | Incidence of Nongonococcal Urethritis in Men Who Have Sex With Women and Associated Risk Factors                                                                                                                                     | Sexually transmitted diseases                 | 10.1097/OLQ.0000000000001314  | Population (did not report data from PrEP users) |
| Roxby, 2019       | <i>Mycoplasma genitalium</i> infection among HIV-infected pregnant African women and implications for mother-to-child transmission of HIV                                                                                            | AIDS                                          | 10.1097/QAD.0000000000002335  | Population (did not report data from PrEP users) |
| Roy, 2021         | Association of <i>Chlamydia trachomatis</i> , <i>Neisseria gonorrhoeae</i> , <i>Mycoplasma genitalium</i> and <i>Ureaplasma</i> species infection and organism load with cervicitis in north Indian population                       | Lett Appl Microbiol                           | 10.1111/lam.13520             | Population (did not report data from PrEP users) |
| Rumyantseva, 2015 | Evaluation of the new AmpliSens multiplex real-time PCR assay for simultaneous detection of <i>Neisseria gonorrhoeae</i> , <i>Chlamydia trachomatis</i> , <i>Mycoplasma genitalium</i> , and <i>Trichomonas vaginalis</i>            | APMIS                                         | 10.1111/apm.12430             | Population (did not report data from PrEP users) |

|                        |                                                                                                                                                                     |                                                          |                                    |                                                  |
|------------------------|---------------------------------------------------------------------------------------------------------------------------------------------------------------------|----------------------------------------------------------|------------------------------------|--------------------------------------------------|
| Sadrpour, 2013         | Detection of Chlamydia trachomatis and Mycoplasma genitalium in semen samples of infertile men using multiplex PCR                                                  | Tehran University Medical Journal                        | NR                                 | Population (did not report data from PrEP users) |
| Saigal, 2016           | Genital Mycoplasma and Chlamydia trachomatis infections in patients with genital tract infections attending a tertiary care hospital of North India                 | Indian Journal of Pathology and Microbiology             | 10.4103/0377-4929.182019           | Population (did not report data from PrEP users) |
| Salado-Rasmussen, 2022 | Clinical Importance of Superior Sensitivity of the Aptima TMA-Based Assays for Mycoplasma genitalium Detection                                                      | Journal of Clinical Microbiology                         | 10.1128/jcm.02369-21               | Population (did not report data from PrEP users) |
| Salado, 2014           | Mycoplasma genitalium testing pattern and macrolide resistance: A Danish nationwide retrospective survey                                                            | Clinical Infectious Diseases                             | 10.1093/cid/ciu217                 | Population (did not report data from PrEP users) |
| Saldanha, 2020         | STIs in adolescents: Chlamydia, gonorrhoea, mycoplasma genitalium, and HPV                                                                                          | Current Problems in Pediatric and Adolescent Health Care | 10.1016/j.cppeds.2020.100835       | Population (did not report data from PrEP users) |
| Sameni, 2022           | Evaluation of Ureaplasma urealyticum, Chlamydia trachomatis, Mycoplasma genitalium and Neisseria gonorrhoeae in infertile women compared to pregnant women          | Journal of Obstetrics and Gynaecology                    | 10.1080/01443615.2022.2035328      | Population (did not report data from PrEP users) |
| Samra, 2011            | Direct simultaneous detection of 6 sexually transmitted pathogens from clinical specimens by multiplex polymerase chain reaction and auto-capillary electrophoresis | Diagnostic Microbiology and Infectious Disease           | 10.1016/j.diagmicrobio.2010.12.001 | Population (did not report data from PrEP users) |
| Sanchez-Garcia, 2021   | Molecular epidemiology of bacterial vaginosis and its association with genital micro-organisms in asymptomatic women                                                | Journal of Medical Microbiology                          | 10.1099/JMM.0.001044               | Population (did not report data from PrEP users) |
| Santa, 2022            | Report of sexually transmitted infections prevalence in asymptomatic pregnant women under 25 years old in Lleida, Spain                                             | Revista Espanola de Quimioterapia                        | 10.37201/req/100.2021              | Population (did not report data from PrEP users) |
| Sarier, 2019           | Prevalence of polymicrobial infection in urethritis                                                                                                                 | Journal of Urological Surgery                            | 10.4274/jus.galenos.2019.2405      | Population (did not report data from PrEP users) |
| Saunders, 2013         | Factors associated with asymptomatic non-chlamydial non-gonococcal urethritis in heterosexual men: Findings from a case-control study                               | International Journal of STD and AIDS                    | 10.1177/0956462413477554           | Population (did not report data from PrEP users) |
| Scaglione, 2022        | Molecular Epidemiology of Genital Infections in Campania Region: A Retrospective Study                                                                              | Diagnostics                                              | 10.3390/diagnostics12081798        | Population (did not report data from PrEP users) |
| Schmidt, 2020          | The swiss STAR trial - An evaluation of target groups for sexually transmitted infection screening in the sub-sample of men                                         | Swiss Medical Weekly                                     | 10.4414/smw.2020.20392             | Population (did not report data from PrEP users) |
| Scoullar, 2021         | Mycoplasma genitalium and Other Reproductive Tract Infections in Pregnant Women, Papua New Guinea, 2015-2017                                                        | Emerg Infect Dis                                         | 10.3201/eid2703.201783             | Population (did not report data from PrEP users) |
| Se-Jin, 2013           | Comparison of the Anyplex II STI-7 and Seeplex STD6 ACE Detection Kits for the Detection of Sexually Transmitted Infections                                         | Journal of Laboratory Medicine and Quality Assurance     | NR                                 | Population (did not report data from PrEP users) |
| Sellami, 2014          | Molecular detection of Chlamydia trachomatis and other sexually transmitted bacteria in semen of male partners of infertile couples in                              | PLoS ONE                                                 | 10.1371/journal.pone.0098903       | Population (did not report data from PrEP users) |



|                   |                                                                                                                                                                                                                     |                                                                |                                  |                                                  |
|-------------------|---------------------------------------------------------------------------------------------------------------------------------------------------------------------------------------------------------------------|----------------------------------------------------------------|----------------------------------|--------------------------------------------------|
|                   | Tunisia: The effect on semen parameters and spermatozoa apoptosis markers                                                                                                                                           |                                                                |                                  |                                                  |
| Seña, 2012        | Chlamydia trachomatis, Mycoplasma genitalium, and Trichomonas vaginalis Infections in Men With Nongonococcal Urethritis: Predictors and Persistence After Therapy                                                   | Journal of Infectious Diseases                                 | 10.1093/infdis/jis356            | Population (did not report data from PrEP users) |
| Seña, 2017        | A silent epidemic: The prevalence, incidence and persistence of mycoplasma genitalium in young asymptomatic women in the United States                                                                              | Sexually Transmitted Infections                                | 10.1136/sextrans-2017-053264.182 | Population (did not report data from PrEP users) |
| Seña, 2018        | A silent epidemic: The prevalence, incidence and persistence of mycoplasma genitalium among young, asymptomatic high-risk women in the United States                                                                | Clinical Infectious Diseases                                   | 10.1093/cid/ciy025               | Population (did not report data from PrEP users) |
| Seo, 2014         | Prevalence of trichomonas vaginalis by PCR in men attending a primary care urology clinic in South Korea                                                                                                            | Korean Journal of Parasitology                                 | 10.3347/kjp.2014.52.5.551        | Population (did not report data from PrEP users) |
| Shah, 2014        | Performance and comparison of self-reported STI symptoms among high-risk populations – MSM, sex workers, persons living with HIV/AIDS – in El Salvador                                                              | International Journal of STD and AIDS                          | 10.1177/0956462414526860         | Population (did not report data from PrEP users) |
| Shigehara, 2011   | Prevalence of genital Mycoplasma, Ureaplasma, Gardnerella, and human papillomavirus in Japanese men with urethritis, and risk factors for detection of urethral human papillomavirus infection                      | Journal of Infection and Chemotherapy                          | 10.1007/s10156-010-0203-0        | Population (did not report data from PrEP users) |
| Shilling, 2021    | Chlamydia trachomatis and Mycoplasma genitalium prevalence and associated factors among women presenting to a pregnancy termination and contraception clinic, 2009-2019                                             | Sexually Transmitted Infections                                | 10.1136/sextrans-2020-054695     | Population (did not report data from PrEP users) |
| Shimada, 2014     | Bacterial loads of Ureaplasma urealyticum contribute to development of urethritis in men                                                                                                                            | International Journal of Std & Aids                            | 10.1177/0956462413504556         | Population (did not report data from PrEP users) |
| Shipitsyna, 2013  | Sexual behaviours, knowledge and attitudes regarding safe sex, and prevalence of non-viral sexually transmitted infections among attendees of youth clinics in St. Petersburg, Russia                               | Journal of the European Academy of Dermatology and Venereology | 10.1111/j.1468-3083.2012.04512.x | Population (did not report data from PrEP users) |
| Shipitsyna, 2020  | Bacterial vaginosis-associated vaginal microbiota is an age-independent risk factor for Chlamydia trachomatis, Mycoplasma genitalium and Trichomonas vaginalis infections in low-risk women, St. Petersburg, Russia | Eur J Clin Microbiol Infect Dis                                | 10.1007/s10096-020-03831-w       | Population (did not report data from PrEP users) |
| Short, 2010       | Mycoplasma genitalium among young, urban pregnant women                                                                                                                                                             | Infectious Diseases in Obstetrics and Gynecology               | 10.1155/2010/984760              | Population (did not report data from PrEP users) |
| Short, 2010       | The demographic, sexual health and behavioural correlates of Mycoplasma genitalium infection among women with clinically suspected pelvic inflammatory disease                                                      | Sexually Transmitted Infections                                | 10.1136/sti.2009.037721          | Population (did not report data from PrEP users) |
| Shahkali, 2018    | Identification of herpes simplex virus, chlamydia trachomatis, and mycoplasma genitalium in infertile seminal fluid samples using multiplex-PCR in Kerman province, Iran (2016)                                     | Iranian Journal of Obstetrics, Gynecology and Infertility      | 10.22038/ijogi.2018.10714        | Population (did not report data from PrEP users) |
| Sienkiewicz, 2021 | Incidence and laboratory diagnosis of sexually-transmitted infections among university students in a high-prevalence community                                                                                      | Journal of American college health : J of ACH                  | 10.1080/07448481.2021.1899185    | Population (did not report data from PrEP users) |
| Silva, 2018       | Genital mycoplasmas and ureaplasmas in cervicovaginal self-collected samples of reproductive-age women: prevalence and risk factors                                                                                 | International Journal of STD and AIDS                          | 10.1177/0956462418774209         | Population (did not report data from PrEP users) |

|                          |                                                                                                                                                                                     |                                                                                                      |                               |                                                  |
|--------------------------|-------------------------------------------------------------------------------------------------------------------------------------------------------------------------------------|------------------------------------------------------------------------------------------------------|-------------------------------|--------------------------------------------------|
| Silveira, 2020           | Prevalence and risk factors associated with Chlamydia trachomatis, Neisseria gonorrhoeae, and Mycoplasma genitalium among women in Pelotas, Southern Brazil                         | International Journal of STD and AIDS                                                                | 10.1177/0956462419898982      | Population (did not report data from PrEP users) |
| Smaoui, 2019             | Human miscarriage and infection in tunisia: Role of mycoplasma hominis and high waddlia seroprevalence                                                                              | Journal of Infection in Developing Countries                                                         | 10.3855/jidc.9829             | Population (did not report data from PrEP users) |
| Smieszek, 2015           | Improving our Understanding of Mycoplasma Genitalium Epidemiology: A Re-Analysis of Two Cohort Studies                                                                              | International Journal of Epidemiology                                                                | NR                            | Population (did not report data from PrEP users) |
| Smieszek, 2016           | Apparently-different clearance rates from cohort studies of Mycoplasma genitalium are consistent after accounting for incidence of infection, recurrent infection, and study design | PLoS ONE                                                                                             | 10.1371/journal.pone.0149087  | Population (did not report data from PrEP users) |
| Smolec, 2021             | Occurrence of urogenital mycoplasmas in men with the common genitourinary diseases                                                                                                  | Brazilian Journal of Microbiology                                                                    | 10.1007/s42770-021-00620-1    | Population (did not report data from PrEP users) |
| Smullin, 2020            | Prevalence and incidence of Mycoplasma genitalium in a cohort of HIV-infected and HIV-uninfected pregnant women in Cape Town, South Africa                                          | Sexually Transmitted Infections                                                                      | 10.1136/sextrans-2019-054255  | Population (did not report data from PrEP users) |
| Soni, 2010               | The prevalence of urethral and rectal Mycoplasma genitalium and its associations in men who have sex with men attending a genitourinary medicine clinic                             | Sexually Transmitted Infections                                                                      | 10.1136/sti.2009.038190       | Population (did not report data from PrEP users) |
| Sonmez, 2018             | Evaluation of symptomatic patients with resistant discharge                                                                                                                         | Acta Dermatovenerologica Croatica                                                                    | NR                            | Population (did not report data from PrEP users) |
| Sonnenberg, 2015         | Epidemiology of Mycoplasma genitalium in British men and women aged 16-44 years: Evidence from the third National Survey of Sexual Attitudes and Lifestyles (Natsal-3)              | International Journal of Epidemiology                                                                | 10.1093/ije/dyv194            | Population (did not report data from PrEP users) |
| Souza, 2013              | Short report: Simultaneous detection of seven sexually transmitted agents in human immunodeficiency virus-infected Brazilian women by multiplex polymerase chain reaction           | American Journal of Tropical Medicine and Hygiene                                                    | 10.4269/ajtmh.13-0315         | Population (did not report data from PrEP users) |
| Spiller, 2020            | Mycoplasma genitalium prevalence in Welsh sexual health patients: Low antimicrobial resistance markers and no association of symptoms to bacterial load                             | Microbial Pathogenesis                                                                               | 10.1016/j.micpath.2019.103872 | Population (did not report data from PrEP users) |
| Spornraft-Ragaller, 2020 | Prevalence and antibiotic resistance of rectal Mollicutes in HIV-infected men who have sex with men at the University Hospital of Dresden, Germany                                  | Infection                                                                                            | 10.1007/s15010-019-01386-3    | Population (did not report data from PrEP users) |
| Spornraft-Ragaller, 2021 | Antimicrobial resistance of Mycoplasma genitalium and treatment outcome in men attending a STI and HIV center in Dresden                                                            | Infection                                                                                            | NR                            | Population (did not report data from PrEP users) |
| Srinivasan, 2021         | Urethral Microbiota in Men: Association of Haemophilus influenzae and Mycoplasma penetrans With Nongonococcal Urethritis                                                            | Clinical infectious diseases : an official publication of the Infectious Diseases Society of America | 10.1093/cid/ciaa1123          | Population (did not report data from PrEP users) |
| Stafford, 2021           | Retrospective analysis of infection and antimicrobial resistance patterns of Mycoplasma genitalium among pregnant women in the southwestern USA                                     | BMJ Open                                                                                             | 10.1136/bmjopen-2021-050475   | Population (did not report data from PrEP users) |

|                       |                                                                                                                                                                                     |                                                          |                                    |                                                  |
|-----------------------|-------------------------------------------------------------------------------------------------------------------------------------------------------------------------------------|----------------------------------------------------------|------------------------------------|--------------------------------------------------|
| Stephen, 2019         | Molecular Diagnosis of Sexually Transmitted Infections (STI) in Symptomatic Women of Puducherry by a Commercial Real Time Multiplex PCR, FTD Urethritis Plus - A Preliminary Report | Journal of Pure and Applied Microbiology                 | 10.22207/jpam.13.3.55              | Population (did not report data from PrEP users) |
| Stewart, 2020         | Should we routinely test for Mycoplasma genitalium when testing for other sexually transmitted infections?                                                                          | Medical Journal of Australia                             | 10.5694/mja2.50399                 | Population (did not report data from PrEP users) |
| Sturt, 2021           | Association of Female Genital Schistosomiasis with the Cervicovaginal Microbiota and Sexually Transmitted Infections in Zambian Women                                               | Open Forum Infectious Diseases                           | 10.1093/ofid/ofab438               | Population (did not report data from PrEP users) |
| Suehiro, 2019         | Association of human papillomavirus and bacterial vaginosis with increased risk of high-grade squamous intraepithelial cervical lesions                                             | International Journal of Gynecological Cancer            | 10.1136/ijgc-2018-000076           | Population (did not report data from PrEP users) |
| Suehiro, 2021         | High molecular prevalence of hpv and other sexually transmitted infections in a population of asymptomatic women who work or study at a brazilian university                        | Revista do Instituto de Medicina Tropical de Sao Paulo   | 10.1590/s1678-9946202163001        | Population (did not report data from PrEP users) |
| Sutton, 2018          | Cost-effectiveness of microscopy of urethral smears for asymptomatic Mycoplasma genitalium urethritis in men in England                                                             | International Journal of STD and AIDS                    | 10.1177/0956462417717651           | Population (did not report data from PrEP users) |
| Svenstrup, 2014       | A cross-sectional study of Mycoplasma genitalium infection and correlates in women undergoing population-based screening or clinic-based testing for Chlamydia infection in London  | Bmj Open                                                 | 10.1136/bmjopen-2013-003947        | Population (did not report data from PrEP users) |
| Sweeney, 2019         | Levels of mycoplasma genitalium antimicrobial resistance differ by both region and gender in the state of Queensland, Australia: Implications for treatment guidelines              | Journal of Clinical Microbiology                         | 10.1128/JCM.01555-18               | Population (did not report data from PrEP users) |
| Sweeney, 2022         | Factors associated with pelvic inflammatory disease: A case series analysis of family planning clinic data                                                                          | Womens Health (Lond)                                     | 10.1177/17455057221112263          | Population (did not report data from PrEP users) |
| Tabrizi, 2016         | Evaluation of the Hologic Panther Transcription-Mediated Amplification Assay for Detection of Mycoplasma genitalium                                                                 | Journal of Clinical Microbiology                         | 10.1128/jcm.01038-16               | Population (did not report data from PrEP users) |
| Tagg, 2013            | Fluoroquinolone and macrolide resistance-associated mutations in Mycoplasma genitalium                                                                                              | Journal of Clinical Microbiology                         | 10.1128/JCM.00495-13               | Population (did not report data from PrEP users) |
| Taher, 2020           | A real-time polymerase chain reaction assay for the simultaneous detection of sexually transmitted pathogens in women                                                               | Indian Journal of Public Health Research and Development | 10.37506/v11/i2/2020/ijphrd/195218 | Full text not found                              |
| Taku, 2021            | Detection of sexually transmitted pathogens and co-infection with human papillomavirus in women residing in rural Eastern Cape, South Africa                                        | PeerJ                                                    | 10.7717/peerj.10793                | Population (did not report data from PrEP users) |
| Takuva, 2014          | Etiology and antimicrobial susceptibility of pathogens responsible for urethral discharge among men in Harare, Zimbabwe                                                             | Sexually Transmitted Diseases                            | 10.1097/OLQ.0000000000000204       | Population (did not report data from PrEP users) |
| Tandon, 2022          | Cross sectional study to evaluate microbiological spectrum of RTI/STI and co-infections among women with cervicitis or cervico-vaginitis from a community clinic in Mumbai          | Indian Journal of Medical Microbiology                   | 10.1016/j.ijmmb.2021.10.003        | Population (did not report data from PrEP users) |
| Taylor-Robinson, 2004 | Mycoplasma genitalium in chronic non-gonococcal urethritis                                                                                                                          | International Journal of STD and AIDS                    | 10.1258/095646204322637209         | Population (did not report data from PrEP users) |

|                |                                                                                                                                                                                                                       |                                          |                               |                                                  |
|----------------|-----------------------------------------------------------------------------------------------------------------------------------------------------------------------------------------------------------------------|------------------------------------------|-------------------------------|--------------------------------------------------|
| Taylor, 2011   | Microbial correlates of delayed care for pelvic inflammatory disease                                                                                                                                                  | Sexually Transmitted Diseases            | 10.1097/OLQ.0b013e3181ffa7c7  | Population (did not report data from PrEP users) |
| Taylor, 2018   | Risk factors for Mycoplasma genitalium endometritis and incident infection: A secondary data analysis of the T cell Response Against Chlamydia (TRAC) Study                                                           | Sexually Transmitted Infections          | 10.1136/sextrans-2017-053376  | Population (did not report data from PrEP users) |
| Thurman, 2010  | Mycoplasma genitalium symptoms, concordance and treatment in high-risk sexual dyads                                                                                                                                   | International Journal of STD and AIDS    | 10.1258/ijsa.2009.008485      | Population (did not report data from PrEP users) |
| Ting, 2013     | High-risk human papillomavirus messenger RNA testing in physician- And self-collected specimens for cervical lesion detection in high-risk women, Kenya                                                               | Sexually Transmitted Diseases            | 10.1097/OLQ.0b013e31828e5a91  | Population (did not report data from PrEP users) |
| Tjagur, 2018   | Prevalence of Mycoplasma genitalium and other sexually transmitted infections causing urethritis among high-risk heterosexual male patients in Estonia                                                                | Infectious Diseases                      | 10.1080/23744235.2017.1366044 | Population (did not report data from PrEP users) |
| Tjagur, 2020   | Profile of sexually transmitted infections causing urethritis and a related inflammatory reaction in urine among heterosexual males: A flow-cytometry study                                                           | PLoS One                                 | 10.1371/journal.pone.0242227  | Population (did not report data from PrEP users) |
| Tjagur, 2021   | Mycoplasma genitalium Provokes Seminal Inflammation among Infertile Males                                                                                                                                             | Int J Mol Sci                            | 10.3390/ijms222413467         | Population (did not report data from PrEP users) |
| Tobian, 2014   | Male circumcision and mycoplasma genitalium infection in female partners: A randomised trial in rakai, uganda                                                                                                         | Sexually Transmitted Infections          | 10.1136/sextrans-2013-051293  | Population (did not report data from PrEP users) |
| Toh, 2022      | Evaluation of Clinical, Gram Stain, and Microbiological Cure Outcomes in Men Receiving Azithromycin for Acute Nongonococcal Urethritis: Discordant Cures Are Associated with Mycoplasma genitalium Infection          | Sexually Transmitted Diseases            | 10.1097/OLQ.0000000000001509  | Population (did not report data from PrEP users) |
| Tomusiak, 2013 | Bacterial infections of the lower genital tract in fertile and infertile women from the south-eastern Poland                                                                                                          | Ginekologia Polska                       | NR                            | Population (did not report data from PrEP users) |
| Tomusiak, 2013 | Bacterial infections of the lower genital tract in fertile and infertile women from the southeastern Poland                                                                                                           | Ginekologia Polska                       | NR                            | Population (did not report data from PrEP users) |
| Torrone, 2021  | Prevalence of Urogenital Mycoplasma genitalium Infection, United States, 2017 to 2018                                                                                                                                 | Sexually transmitted diseases            | 10.1097/OLQ.0000000000001394  | Population (did not report data from PrEP users) |
| Tovo, 2021     | Molecular epidemiology of human papillomaviruses, neisseria gonorrhoeae, chlamydia trachomatis and mycoplasma genitalium among female sex workers in burkina faso: Prevalence, coinfections and drug resistance genes | Tropical Medicine and Infectious Disease | 10.3390/tropicalmed6020090    | Population (did not report data from PrEP users) |
| Trent, 2018    | Clinical and sexual risk correlates of Mycoplasma genitalium in urban pregnant and non-pregnant young women: Cross-sectional outcomes using the baseline data from the Women's BioHealth Study                        | Sexually Transmitted Infections          | 10.1136/sextrans-2017-053367  | Population (did not report data from PrEP users) |
| Trent, 2020    | Clearance of mycoplasma genitalium and trichomonas vaginalis among adolescents and young adults with pelvic inflammatory disease: Results from the tech-N study                                                       | Sexually Transmitted Diseases            | 10.1097/OLQ.0000000000001221  | Population (did not report data from PrEP users) |

|                    |                                                                                                                                                                                                                   |                                                 |                                |                                                  |
|--------------------|-------------------------------------------------------------------------------------------------------------------------------------------------------------------------------------------------------------------|-------------------------------------------------|--------------------------------|--------------------------------------------------|
| Treviño, 2021      | Mycoplasma genitalium in Primary Care: Prevalence and azithromycin resistance in Santiago de Compostela Health Care Area                                                                                          | Revista Espanola de Quimioterapia               | 10.37201/req/052.2021          | Population (did not report data from PrEP users) |
| Trevis, 2018       | Mycoplasma genitalium in the Far North Queensland backpacker population: An observational study of prevalence and azithromycin resistance                                                                         | PLoS ONE                                        | 10.1371/journal.pone.0202428   | Population (did not report data from PrEP users) |
| Tucker, 2018       | Mycoplasma genitalium: an important sexually transmitted infection comes into focus                                                                                                                               | Sexually transmitted infections                 | 10.1136/sextrans-2017-053517   | Population (did not report data from PrEP users) |
| Twin, 2011         | Comparison of two Mycoplasma genitalium real-time PCR detection methodologies                                                                                                                                     | Journal of Clinical Microbiology                | 10.1128/JCM.02328-10           | Population (did not report data from PrEP users) |
| Tyulenev, 2020     | Sexually transmitted infections in asymptomatic men who have sex with men                                                                                                                                         | Klinicheskaya Dermatologiya i Venerologiya      | 10.17116/klinderma202019061802 | Full text not found                              |
| Upton, 2018        | Diagnosis of Chlamydia trachomatis, Neisseria gonorrhoeae, Trichomonas vaginalis and Mycoplasma genitalium: An observational study of testing patterns, prevalence and co-infection rates in northern New Zealand | Sexual Health                                   | 10.1071/SH17110                | Population (did not report data from PrEP users) |
| Van Der Pol, 2020  | A profile of the cobas® TV/ MG test for the detection of Trichomonas vaginalis and Mycoplasma genitalium                                                                                                          | Expert Review of Molecular Diagnostics          | 10.1080/14737159.2020.1714440  | Population (did not report data from PrEP users) |
| Van Der Pol, 2020  | Mycoplasma genitalium detection in urogenital specimens from symptomatic and asymptomatic men and women by use of the cobas TV/MG test                                                                            | Journal of Clinical Microbiology                | 10.1128/JCM.02124-19           | Population (did not report data from PrEP users) |
| Van Der Pol, 2021  | Trichomonas vaginalis Detection in Urogenital Specimens from Symptomatic and Asymptomatic Men and Women by Use of the cobas TV/MG Test                                                                            | J Clin Microbiol                                | 10.1128/jcm.00264-21           | Population (did not report data from PrEP users) |
| Van Der Veer, 2016 | Trichomonas vaginalis and Mycoplasma genitalium: Age-specific prevalence and disease burden in men attending a sexually transmitted infections clinic in Amsterdam, the Netherlands                               | Sexually Transmitted Infections                 | 10.1136/sextrans-2015-052118   | Population (did not report data from PrEP users) |
| Van Dijck, 2022    | Gonococcal bacterial load in PrEP users with Mycoplasma genitalium coinfection                                                                                                                                    | International Journal of STD and AIDS           | 10.1177/09564624211048678      | Outcome                                          |
| Van Praet, 2019    | Prevalence and macrolide resistance of mycoplasma genitalium after initiation of HIV preexposure prophylaxis                                                                                                      | Open Forum Infectious Diseases                  | 10.1093/ofid/ofz359.063        | Duplicate data                                   |
| Vandepitte, 2012   | Clinical characteristics associated with mycoplasma genitalium infection among women at high risk of HIV and other STI in Uganda                                                                                  | Sexually Transmitted Diseases                   | 10.1097/OLQ.0b013e31824b1cf3   | Population (did not report data from PrEP users) |
| Vandepitte, 2012   | Prevalence and correlates of mycoplasma genitalium infection among female sex workers in Kampala, Uganda                                                                                                          | Journal of Infectious Diseases                  | 10.1093/infdis/jir733          | Population (did not report data from PrEP users) |
| Vandepitte, 2013   | Alcohol use, mycoplasma genitalium, and other STIs associated with HIV incidence among women at high risk in Kampala, Uganda                                                                                      | Journal of Acquired Immune Deficiency Syndromes | 10.1097/QAI.0b013e3182777167   | Population (did not report data from PrEP users) |
| Vandepitte, 2013   | Natural history of mycoplasma genitalium infection in a cohort of female sex workers in Kampala, Uganda                                                                                                           | Sexually Transmitted Diseases                   | 10.1097/OLQ.0b013e31828bfccf   | Population (did not report data from PrEP users) |

|                  |                                                                                                                                                                                                                                                    |                                                 |                               |                                                  |
|------------------|----------------------------------------------------------------------------------------------------------------------------------------------------------------------------------------------------------------------------------------------------|-------------------------------------------------|-------------------------------|--------------------------------------------------|
| Vandepitte, 2014 | Association between Mycoplasma genitalium infection and HIV acquisition among female sex workers in Uganda: Evidence from a nested case-control study                                                                                              | Sexually Transmitted Infections                 | 10.1136/sextrans-2013-051467  | Population (did not report data from PrEP users) |
| Varma, 2021      | Low Awareness of Mycoplasma genitalium in Men Who Have Sex With Men in Sydney, Australia                                                                                                                                                           | Sexually transmitted diseases                   | 10.1097/OLQ.0000000000001487  | Outcome                                          |
| Vazquez, 2020    | Pelvic Inflammatory Disease Due to Mycoplasma genitalium: A Character in Search of an Author                                                                                                                                                       | Clinical Infectious Diseases                    | 10.1093/cid/ciaa506           | Population (did not report data from PrEP users) |
| Veiga, 2020      | Colonisation of the male reproductive tract in asymptomatic infertile men: Effects on semen quality                                                                                                                                                | Andrologia                                      | 10.1111/and.13637             | Population (did not report data from PrEP users) |
| Vica, 2015       | DETERMINATION OF SEXUALLY TRANSMITTED DISEASES FREQUENCY BY SIMULTANEOUS DETECTION OF SIX PATHOGENS USING PCR METHODS                                                                                                                              | Journal of Environmental Protection and Ecology | NR                            | Population (did not report data from PrEP users) |
| Vielot, 2015     | The role of chlamydia trachomatis in high-risk human papillomavirus persistence among female sex workers in Nairobi, Kenya                                                                                                                         | Sexually Transmitted Diseases                   | 10.1097/OLQ.0000000000000287  | Population (did not report data from PrEP users) |
| Vives, 2021      | Epidemiological, clinical and laboratory differences between male urethral infections due to Haemophilus spp. and those due to Neisseria gonorrhoeae, Chlamydia trachomatis, Mycoplasma genitalium and Ureaplasma urealyticum: A descriptive study | Archivio Italiano Di Urologia E Andrologia      | 10.4081/aiua.2021.4.468       | Population (did not report data from PrEP users) |
| Vodstrcil, 2022  | Combination Therapy for Mycoplasma genitalium, and New Insights Into the Utility of parC Mutant Detection to Improve Cure                                                                                                                          | Clinical Infectious Diseases                    | 10.1093/cid/ciab1058          | Population (did not report data from PrEP users) |
| Walker, 2011     | The difference in determinants of Chlamydia trachomatis and Mycoplasma genitalium in a sample of young Australian women'                                                                                                                           | BMC Infectious Diseases                         | 10.1186/1471-2334-11-35       | Population (did not report data from PrEP users) |
| Walker, 2013     | Mycoplasma genitalium Incidence, Organism Load, and treatment failure in a cohort of young Australian women                                                                                                                                        | Clinical Infectious Diseases                    | 10.1093/cid/cis1210           | Population (did not report data from PrEP users) |
| Wallis, 2019     | Mycoplasma genitalium testing in clinical practice: Prevalence and resistance rates in a south London sexual health clinic                                                                                                                         | Sexually Transmitted Infections                 | 10.1136/sextrans-2019-sti.686 | Population (did not report data from PrEP users) |
| Wang, 2012       | The prevalence of six species of Mycoplasmataceae in an HIV/AIDS population in Jiangsu Province, China                                                                                                                                             | International Journal of STD and AIDS           | 10.1258/ijsa.2009.009396      | Population (did not report data from PrEP users) |
| Wang, 2018       | Loop-mediated isothermal amplification on crude DNA as a point-of-care test for the diagnosis of mycoplasma-related vaginitis during early pregnancy                                                                                               | Lab Medicine                                    | 10.1093/labmed/lmx063         | Population (did not report data from PrEP users) |
| Wang, 2019       | Association between asymptomatic sexually transmitted infections and high-risk human papillomavirus in cervical lesions                                                                                                                            | Journal of International Medical Research       | 10.1177/0300060519865633      | Population (did not report data from PrEP users) |
| Wang, 2020       | Prevalence of co-infections with other sexually transmitted infections in patients newly diagnosed with anogenital warts in Guangzhou, China                                                                                                       | International Journal of STD and AIDS           | 10.1177/0956462419890496      | Population (did not report data from PrEP users) |
| Wang, 2022       | Mycoplasma genitalium Infection Is Not Associated With Genital Tract Inflammation Among Adolescent and Young Adult Women in Baltimore, Maryland                                                                                                    | Sexually Transmitted Diseases                   | 10.1097/OLQ.0000000000001524  | Full text not found                              |

|                   |                                                                                                                                                                                                        |                                                         |                               |                                                  |
|-------------------|--------------------------------------------------------------------------------------------------------------------------------------------------------------------------------------------------------|---------------------------------------------------------|-------------------------------|--------------------------------------------------|
| Wendt, 2019       | Prospective evaluation study on the benefit of the simultaneous detection of seven sexually transmitted pathogens for the clinical management of patients suffering from sexually transmitted diseases | Journal of Laboratory Medicine                          | 10.1515/labmed-2018-0322      | Population (did not report data from PrEP users) |
| Wesbonk, 2014     | Prevalence and determinants of sexually transmitted infections in women at risk undergoing abortion in a swiss primary care setting                                                                    | Praxis                                                  | 10.1024/1661-8157/a001724     | Population (did not report data from PrEP users) |
| Wetmore, 2011     | Demographic, behavioral, and clinical characteristics of men with nongonococcal urethritis differ by etiology: A case-comparison study                                                                 | Sexually Transmitted Diseases                           | 10.1097/OLQ.0b013e3182040de9  | Population (did not report data from PrEP users) |
| Wiringa, 2020     | Trichomonas vaginalis, endometritis and sequelae among women with clinically suspected pelvic inflammatory disease                                                                                     | Sexually Transmitted Infections                         | 10.1136/sextrans-2019-054079  | Population (did not report data from PrEP users) |
| Wohlmeister, 2016 | Association of human papillomavirus and Chlamydia trachomatis with intraepithelial alterations in cervix samples                                                                                       | Memorias do Instituto Oswaldo Cruz                      | 10.1590/0074-02760150330      | Population (did not report data from PrEP users) |
| Woo-Jin, 2013     | PCR-based Investigation of Infection Patterns in Patients with Pelvic Inflammatory Diseases in Jeju                                                                                                    | Laboratory Medicine Online                              | NR                            | Population (did not report data from PrEP users) |
| Wood, 2020        | Sequence variation and immunogenicity of the Mycoplasma genitalium MgpB and MgpC adherence proteins during persistent infection of men with non-gonococcal urethritis                                  | PLoS ONE                                                | 10.1371/journal.pone.0240626  | Population (did not report data from PrEP users) |
| Wood, 2021        | Vaginal Mycoplasmataceae colonization and association with immune mediators in pregnancy                                                                                                               | Journal of Maternal-Fetal and Neonatal Medicine         | 10.1080/14767058.2019.1663820 | Population (did not report data from PrEP users) |
| Woodward, 2021    | Using multiplex nucleic acid amplification tests in the diagnosis and screening for trichomonas vaginalis and mycoplasma genitalium                                                                    | International Journal of STD and AIDS                   | 10.1177/0956462420987415      | Population (did not report data from PrEP users) |
| Wu, 2013          | Mycoplasmas infection in male HIV/AIDS patients in Jiangsu, China                                                                                                                                      | Microbial Pathogenesis                                  | 10.1016/j.micpath.2013.06.003 | Population (did not report data from PrEP users) |
| Xiang, 2012       | Risk factors for Mycoplasma genitalium infection among female sex workers: a cross-sectional study in two cities in southwest China                                                                    | BMC public health                                       | NR                            | Population (did not report data from PrEP users) |
| Xiao, 2019        | Mycoplasma genitalium infections with macrolide and fluoroquinolone resistance-Associated mutations in heterosexual african American couples in Alabama                                                | Sexually Transmitted Diseases                           | 10.1097/OLQ.0000000000000891  | Population (did not report data from PrEP users) |
| Xie, 2021         | Investigation of the association between ten pathogens causing sexually transmitted diseases and high-risk human papilloma virus infection in shanghai                                                 | Molecular and Clinical Oncology                         | 10.3892/mco.2021.2294         | Population (did not report data from PrEP users) |
| Xiu, 2019         | Simultaneous detection of eleven sexually transmitted agents using multiplexed PCR coupled with MALDI-TOF analysis                                                                                     | Infection and Drug Resistance                           | 10.2147/idr.S219580           | Population (did not report data from PrEP users) |
| Yagur, 2021       | Characteristics of pelvic inflammatory disease caused by sexually transmitted disease – An epidemiologic study                                                                                         | Journal of Gynecology Obstetrics and Human Reproduction | 10.1016/j.jogoh.2021.102176   | Population (did not report data from PrEP users) |
| Yeganeh, 2013     | A survey on the prevalence of chlamydia trachomatis and mycoplasma genitalium infections in symptomatic and asymptomatic men referring to urology clinic of Labbafinejad Hospital, Tehran, Iran        | Iranian Red Crescent Medical Journal                    | 10.5812/ircmj.8600            | Population (did not report data from PrEP users) |

|                |                                                                                                                                                                            |                                              |                               |                                                  |
|----------------|----------------------------------------------------------------------------------------------------------------------------------------------------------------------------|----------------------------------------------|-------------------------------|--------------------------------------------------|
| Yew, 2011      | Letters to the editor induced macrolide resistance in mycoplasma genitalium isolates from patients with recurrent nongonococcal urethritis                                 | Journal of Clinical Microbiology             | 10.1128/JCM.02475-10          | Population (did not report data from PrEP users) |
| Yin, 2013      | Association of sexually transmitted infections with high-risk human papillomavirus types: a survey with 802 female sex workers in china                                    | Sex Transm Dis                               | 10.1097/OLQ.0b013e31828b32b8  | Population (did not report data from PrEP users) |
| Yow, 2014      | Detection of infectious organisms in archival prostate cancer tissues                                                                                                      | BMC Cancer                                   | 10.1186/1471-2407-14-579      | Population (did not report data from PrEP users) |
| Zahirnia, 2018 | Frequency of chlamydia trachomatis, mycoplasma genitalium, and ureaplasma urealyticum isolated from vaginal samples of women in Kerman, Iran                               | Archives of Clinical Infectious Diseases     | 10.5812/archcid.65334         | Population (did not report data from PrEP users) |
| Zanotta, 2019  | Emerging role for Ureaplasma parvum serovar 3: Active infection in women with silent high-risk human papillomavirus and in women with idiopathic infertility               | Journal of Cellular Physiology               | 10.1002/jcp.28423             | Population (did not report data from PrEP users) |
| Zanotta, 2019  | Merkel Cell Polyomavirus Is Associated with Anal Infections in Men Who Have Sex with Men                                                                                   | Microorganisms                               | 10.3390/microorganisms7020054 | Population (did not report data from PrEP users) |
| Ze-Chen, 2018  | Impact of Mycoplasma genitalium infection on the semen quality of infertile males                                                                                          | National Journal of Andrology                | NR                            | Full text not found                              |
| Zhang, 2021    | Prevalence and correlates of Mycoplasma genitalium infection among patients attending a sexually transmitted infection clinic in Guangdong, China: a cross-sectional study | BMC Infectious Diseases                      | 10.1186/s12879-021-06349-4    | Population (did not report data from PrEP users) |
| Zhao, 2019     | Mycoplasma Genitalium and Mycoplasma Hominis are prevalent and correlated with HIV risk in MSM: A cross-sectional study in Shenyang, China                                 | BMC Infectious Diseases                      | 10.1186/s12879-019-4138-5     | Population (did not report data from PrEP users) |
| Zheng, 2014    | An epidemiological study of mycoplasma genitalium infections among males attending a sexually transmitted disease clinic in Guangxi, China                                 | Japanese Journal of Infectious Diseases      | 10.7883/yoken.67.17           | Population (did not report data from PrEP users) |
| Zheng, 2014    | The prevalence of urethral and rectal Mycoplasma genitalium among men who have sex with men in China, a cross-sectional study                                              | BMC public health                            | 10.1186/1471-2458-14-195      | Population (did not report data from PrEP users) |
| Zhou, 2022     | Single gene targeted nanopore sequencing enables simultaneous identification and antimicrobial resistance detection of sexually transmitted infections                     | PLoS ONE                                     | 10.1371/journal.pone.0262242  | Population (did not report data from PrEP users) |
| Zimba, 2011    | Aetiology of sexually transmitted infections in Maputo, Mozambique                                                                                                         | Journal of Infection in Developing Countries | NR                            | Population (did not report data from PrEP users) |
