# Supplementary material
Source: HighWire-hosted journal article supplement (https://sti.bmj.com/content/99/5/351)

## Supplementary Material 6: Sensitivity analyses.

**Figure 1:** Prevalence of MG infection among PrEP users, estimated with Freeman-Tukey double arcsine as the transformation method for prevalence estimates.

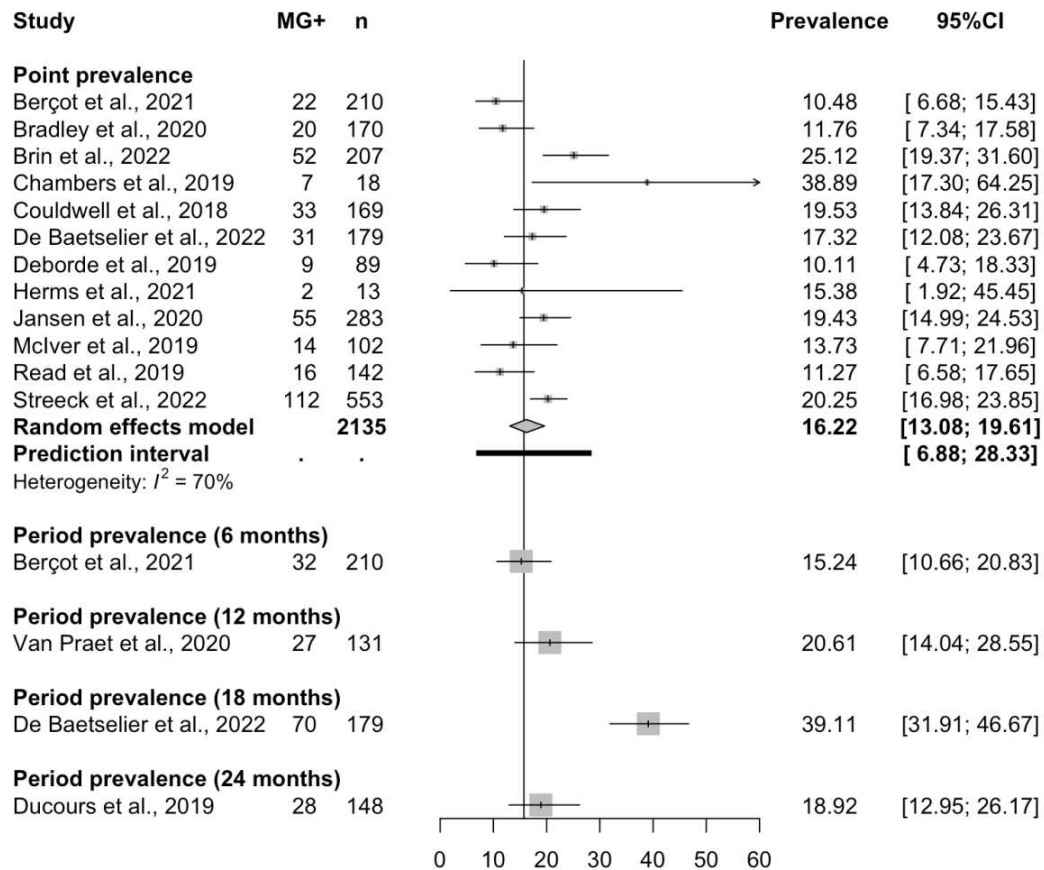

**Figure 2:** Prevalence of macrolide-resistant MG infection among PrEP users, estimated with Freeman-Tukey double arcsine as the transformation method for prevalence estimates.

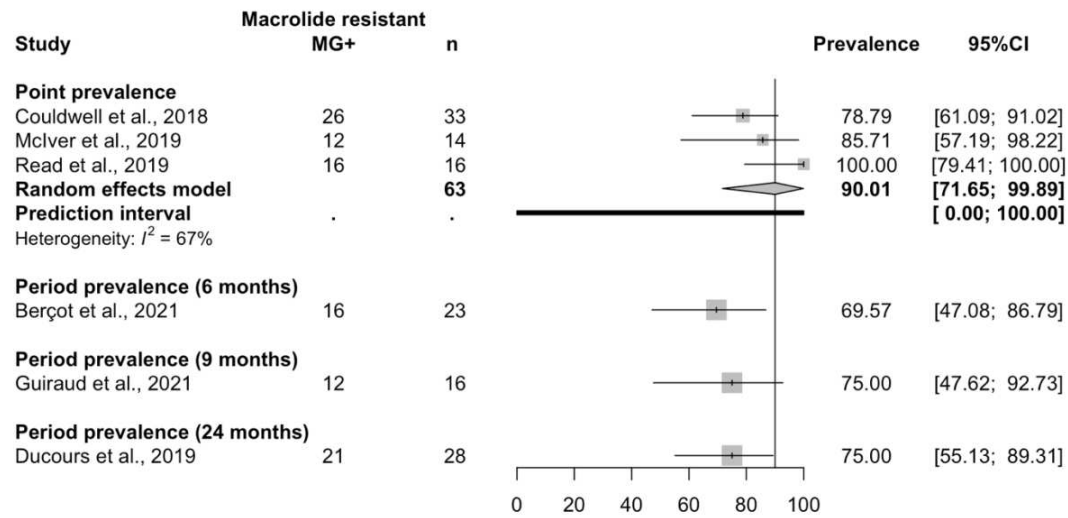

Supplement: inline-supplementary-material-6 [file inline-supplementary-material-6.pdf]
