# Supplementary material
Source: HighWire-hosted journal article supplement (https://sti.bmj.com/content/99/5/351)
Supplement: inline-supplementary-material-8 [file inline-supplementary-material-8.pdf]

## RESUMO

**Objetivos:** Sumarizar a prevalência de infecção por *Mycoplasma genitalium* (MG) e MG resistente a antibióticos em indivíduos usando a profilaxia pré-exposição ao HIV (PrEP).

**Métodos:** Foi realizada busca nas bases MEDLINE, Embase, Web of Science e Global Index Medicus até 30 de setembro de 2022. Foram incluídos estudos reportando a prevalência de infecção por MG e/ou MG resistente a antibióticos em indivíduos utilizando PrEP. A seleção de estudos e extração de dados foram realizadas por dois revisores independentes. Os resultados foram sumarizados por metanálise com modelo de efeitos aleatórios. A avaliação dos estudos foi realizada com a ferramenta *JBI checklist for prevalence studies* e a avaliação da qualidade da evidência com a metodologia GRADE.

**Resultados:** Foram incluídos 15 estudos (2.341 indivíduos utilizando PrEP), conduzidos em países desenvolvidos entre 2014 e 2019. A mediana da idade dos indivíduos variou entre 23,5 e 40 anos. 85% eram homens, dos quais 93% eram homens que fazem sexo com homens. Foram avaliadas amostras de urina em 14 estudos, *swab* anal ou retal em 12, *swab* oral ou faríngeo em nove e *swab* uretral ou vaginal em três. A prevalência ponto da infecção por MG foi de 16,7% (intervalo de confiança de 95% [IC95%] 13,6-20,3; intervalo de predição de 95% [IP95%] 8,2-31,1). As prevalências ponto de infecções por MG resistente a macrolídeos e fluoroquinolonas foram, respectivamente, 82,6% (95%IC 70,1-90,6; 95%PI 4,7-99,8) e 14,3% (IC95% 1,8-42,8). Indivíduos usando PrEP apresentam maior chance de infecção em comparação a não usuários de PrEP (razão de chances [*odds ratio*] 2,30; IC95% 1,6-3,4). A qualidade da evidência foi avaliada como muito baixa a moderada.

**Conclusão:** Foi observada alta prevalência de infecções por MG e por MG resistente a macrolídeos entre indivíduos usando PrEP. Esses resultados ressaltam a necessidade de reforçar estratégias de prevenção contra infecções sexualmente transmissíveis nesta população.

**Palavras-chave:** *Mycoplasma genitalium*, resistência a antibióticos, resistência antimicrobiana, profilaxia pré-exposição ao HIV, PrEP, prevalência
